1 **Title:**

2 ***Nos2*<sup>-/-</sup> mice infected with *M. tuberculosis* develop neurobehavioral changes and**  
3 **immunopathology mimicking human central nervous system tuberculosis**

4

5 **Authors:**

6 Xuan Ying Poh<sup>1</sup>, Jia Mei Hong<sup>1</sup>, Chen Bai<sup>1</sup>, Qing Hao Miow<sup>1</sup>, Pei Min Thong<sup>1</sup>, Yu Wang<sup>1</sup>,  
7 Ravisankar Rajarethinam<sup>2</sup>, Catherine W.M. Ong<sup>1, 3, 4\*</sup>

8

9 **Affiliations:**

10 <sup>1</sup>Infectious Diseases Translational Research Programme, Department of Medicine, Yong Loo  
11 Lin School of Medicine, National University of Singapore, Singapore

12 <sup>2</sup>Advanced Molecular Pathology Laboratory, Institute of Molecular and Cell Biology,  
13 Agency for Science, Technology and Research (A\*STAR), Singapore

14 <sup>3</sup> Division of Infectious Diseases, Department of Medicine, National University Hospital

15 <sup>4</sup> Institute for Health Innovation and Technology (iHealthtech), National University of  
16 Singapore

17

18 **\* Corresponding author**

19 Catherine W.M. Ong

20 10<sup>th</sup> floor, Tower Block,

21 1E Kent Ridge Road

22 Singapore 119228

23 Email: [Catherine\\_wm\\_ong@nuhs.edu.sg](mailto:Catherine_wm_ong@nuhs.edu.sg)

24

25 **Abstract word count (limit): 145 (150)**

26 **Word count: 3896**

27 **Page numbers: 43**

28 **Figures: 6**

29 **Tables: 2**

30 **Video 1.** Saline control *Nos2*<sup>-/-</sup> mice

31 **Video 2.** *Nos2*<sup>-/-</sup> mice infected with *M.tb* via the i.c.vent. route exhibited myoclonic jerks and

32 limb weakness.

33 **Supplementary Tables: 1**

34 **Supplementary Figures: 7**

35

36 **ABSTRACT (150 words max)**

37 Understanding the pathophysiology of central nervous system tuberculosis (CNS-TB) is  
38 hampered by the lack of a good pre-clinical model that mirrors the human CNS-TB infection.  
39 We developed a murine CNS-TB model that demonstrates neurobehavioral changes with  
40 similar immunopathology with human CNS-TB. Intra-cerebroventricular (i.c.vent.) infection  
41 of *Nos2*<sup>-/-</sup> mice with *Mycobacterium tuberculosis* (*M.tb*) led to development of neurological  
42 signs and more severe brain granulomas compared to C3HeB/FeJ mice. Compared with  
43 CDC1551 *M.tb*, H37Rv *M.tb* infection resulted in a higher neurobehavioral score and earlier  
44 mortality. I.c.vent. infection caused necrotic neutrophil-dominated pyogranulomas in the brain  
45 relative to intravenous (i.v.) infection which resulted in disseminated granulomas and  
46 mycobacteraemia. Immunological analysis found H37Rv i.c.vent.-infected mice to  
47 demonstrate higher brain concentrations of inflammatory cytokines, chemokines and adhesion  
48 molecule ICAM-1 than H37Rv i.v.-infected mice. Our murine CNS-TB model serves as a pre-  
49 clinical platform to dissect host-pathogen interactions and evaluate therapeutic agents for CNS-  
50 TB.

## 51 INTRODUCTION

52 The most severe form of *Mycobacterium tuberculosis* (*M.tb*) infection is central nervous  
53 system tuberculosis (CNS-TB) which has high mortality and serious long-term neurological  
54 sequelae even with effective anti-tuberculous treatment (Rock, Olin, Baker, Molitor, &  
55 Peterson, 2008; The Lancet, 2011; Wilkinson et al., 2017). Common manifestations of human  
56 CNS-TB are tuberculous meningitis (TBM), tuberculomas and tuberculous brain abscesses  
57 (Rom, 2004). Cerebral vasculitis and inflammation resulting in infarcts is the primary cause of  
58 permanent brain tissue damage in TBM and is among the worst consequences of CNS-TB (P.  
59 R. Donald & Schoeman, 2004; Lammie, Hewlett, Schoeman, & Donald, 2009). Despite  
60 effective TB treatment with antibiotics and adjunctive corticosteroids, CNS-TB remains one of  
61 the more challenging clinical syndromes to manage.

62

63 To advance our understanding of CNS-TB, we need an appropriate animal model that  
64 recapitulates the neurobehavioral, immunopathological and histopathological changes in  
65 human CNS-TB to dissect pathogenesis and aid drug discovery. Several animal models of  
66 CNS-TB have been described, including guinea pigs, rabbits, mice, pigs, and zebrafish. The  
67 rabbit model closely mimics human disease, developing clinical and histological changes  
68 (Bolin et al., 1997; Mazzolla et al., 2002; Shope & Lewis, 1929; Swaim et al., 2006; Tsenova  
69 et al., 2002; Tsenova, Sokol, Freedman, & Kaplan, 1998; Tucker et al., 2016). However, a  
70 number of immunological tools profiling protein secretion and gene expression are unavailable  
71 for rabbits (Rock et al., 2008) and therefore preclude their suitability for in-depth  
72 immunological studies.

73

74 The mouse model has many advantages over other animals, including the availability of genetic  
75 and molecular tools as well as cost-effectiveness for large studies. However, existing murine  
76 CNS-TB models do not display the clinical features and immunological phenotypes of CNS-  
77 TB observed in humans. C57BL/6 mice are generally resistant to CNS-TB infection, with no  
78 pathological abnormalities detected and no observed mortality over 24 weeks of study (van  
79 Well et al., 2007). BALB/c mice infected through the intracerebral route directly into the brain  
80 parenchyma with *Mycobacterium bovis* BCG (BCG) had infiltration of inflammatory cells, but  
81 no granulomas were observed (Mazzolla et al., 2002). This contrasts with human CNS-TB  
82 where tuberculomas occur in approximately 30% of TBM patients (Schaller, Wicke, Foerch,  
83 & Weidauer, 2019). Intravenous inoculation of BALB/c mice with *M.tb* strain CDC1551  
84 successfully infected the CNS but did not produce granulomas in the brain and had low  
85 expression of brain chemokines and cytokines IL-1 $\beta$ , IL-6, TNF- $\alpha$  and IFN- $\gamma$ , in contrast to the  
86 increased expression of these cytokines in the cerebrospinal fluid (CSF) of human TBM  
87 patients (Be et al., 2008; Sharma et al., 2017). While some murine CNS-TB models have  
88 meningitis and/or brain granulomas, they do not demonstrate neurological signs of disease and  
89 mortality, unlike human CNS-TB (van Well et al., 2007; Zucchi et al., 2012). Given the varying  
90 susceptibility and pathology of CNS-TB infection in different mouse strains, genetic  
91 predisposition is likely to play a crucial role. C3HeB/FeJ “Kramnik” mice were found to be  
92 hyper susceptible to *M.tb* infection due to the presence of an allele, termed the “super  
93 susceptibility to tuberculosis 1” (*sst1*) locus, and developed a more human-like lung pathology  
94 in contrast to C57BL/6 mice (Irwin et al., 2015; Kramnik, Dietrich, Demant, & Bloom, 2000).  
95 However, the ability of C3HeB/FeJ mice to develop CNS-TB remains to be explored.

96

97 Intracerebral-infection with *M.tb* H37Rv directly into the brain parenchyma of inducible nitric  
98 oxide synthase (iNOS)-knockout mice resulted in neurological signs with meningitis, and mice

99 exhibited 63% mortality post-infection (p.i.) (Olin et al., 2008). However, the development of  
100 intracerebral tuberculomas and immunological profile were not phenotyped in this mouse  
101 model. Cytokine-induced upregulation of iNOS or NOS2 by murine macrophages have been  
102 implicated in the killing of intracellular pathogens such as *M.tb*, but the role of this  
103 antimicrobial system in human macrophages remains unclear (Chan, Chan, & Schluger, 2001;  
104 Schneemann & Schoeden, 2007). Studies have shown that activated human microglia, the brain  
105 resident macrophages, do not express iNOS (Lee, Dickson, Liu, & Brosnan, 1993; Rock et al.,  
106 2005) or reactive nitrogen intermediate (RNI) nitric oxide (NO) (Peterson, Hu, Anderson, &  
107 Chao, 1994), whereas murine microglia produced substantial amounts of NO on activation  
108 (Peterson et al., 1994). Given the well-established role of macrophages in TB, the inter-species  
109 difference in microglia expression of iNOS may explain the species tropism barrier to the  
110 development of CNS-TB in mice.

111

112 To address the limitations of existing murine CNS-TB models, we explored the effects of  
113 mouse strains, *M.tb* strains and routes of infection on the development of CNS-TB disease.  
114 First, we compared two mouse strains, C3HeB/FeJ and *Nos2*<sup>-/-</sup> mice, to investigate whether the  
115 *sst1* locus or *Nos2* gene plays a more important role in CNS-TB infection. After selecting the  
116 suitable mouse strain, we investigated the effects of two different *M.tb* strains, H37Rv and  
117 CDC1551, and two routes of infection: intra-cerebroventricular (i.c.vent.) into the third  
118 ventricle and intravenous (i.v.), on the development of a murine CNS-TB model with human-  
119 like pathology. The i.c.vent. route of infection mimics the rupture of meningeal tuberculous  
120 lesions and the subsequent release of *M.tb* into the CSF, whereas the i.v. route mimics the  
121 hematogenous spread of *M.tb*. In this study, we showed that i.c.vent. infection of *Nos2*<sup>-/-</sup> mice  
122 with *M.tb* H37Rv developed the most severe neurological symptoms and induced a high  
123 expression of adhesion molecules, chemokines, and inflammatory cytokines in the brain,

124 consistent with the infiltration of inflammatory cells and pathological changes. This pre-  
125 clinical model can be used to understand the mechanisms in host immunopathology and  
126 evaluate treatment for CNS-TB.

127

## 128 RESULTS

### 129 ***M.tb* infected *Nos2*<sup>-/-</sup> strain exhibited worse neurobehavioral score and worse** 130 **histopathological changes in the brain than C3HeB/FeJ strain**

131 To investigate whether *Nos2*<sup>-/-</sup> or C3HeB/FeJ mice better replicate human CNS-TB , we  
132 inoculated each mouse with  $9.15 \pm 2.33 \times 10^4$  colony forming units (CFU; mean  $\pm$  s.d) of *M.tb*  
133 CDC1551 into the third ventricle to infect the meninges (Supplementary figure 1). Infected  
134 *Nos2*<sup>-/-</sup> mice displayed neurological symptoms such as twitching and limb weakness from 3  
135 weeks post-infection (p.i.) (Video 2) that were not observed in infected C3HeB/FeJ mice or  
136 saline control mice (Video 1). Infected *Nos2*<sup>-/-</sup> mice had significantly higher neurobehavioral  
137 scores than infected C3HeB/FeJ mice at 4 and 8 weeks p.i. (Figure 1a,  $p < 0.0001$  and  $p <$   
138  $0.0001$  respectively). Neurological behavior assessed include tremors, twitches and appearance  
139 of eyes, with higher neurobehavioral scores reflecting an increasing severity of neurological  
140 deficits. CFU enumeration showed that brain and lung homogenates of infected *Nos2*<sup>-/-</sup> mice  
141 had higher mycobacterial load compared to infected C3HeB/FeJ mice that had a trend to  
142 statistical significance (Figure 1b). Median (IQR) brain CFU count in *Nos2*<sup>-/-</sup> and C3HeB/FeJ  
143 mice was  $5 \times 10^5$  ( $1.65 \times 10^5 - 5.8 \times 10^5$ ) compared to  $9.75 \times 10^2$  ( $6.25 \times 10^1 - 5 \times 10^3$ )  
144 respectively ( $p = 0.057$ ), while median (IQR) lung CFU count was  $1.00 \times 10^3$  ( $6.5 \times 10^2 - 1.5$   
145  $\times 10^3$ ) in infected *Nos2*<sup>-/-</sup> mice and 0 (0 – 75) in infected C3HeB/FeJ mice ( $p = 0.057$ ).  
146 Mycobacterial load in the liver, spleen and blood were similar.



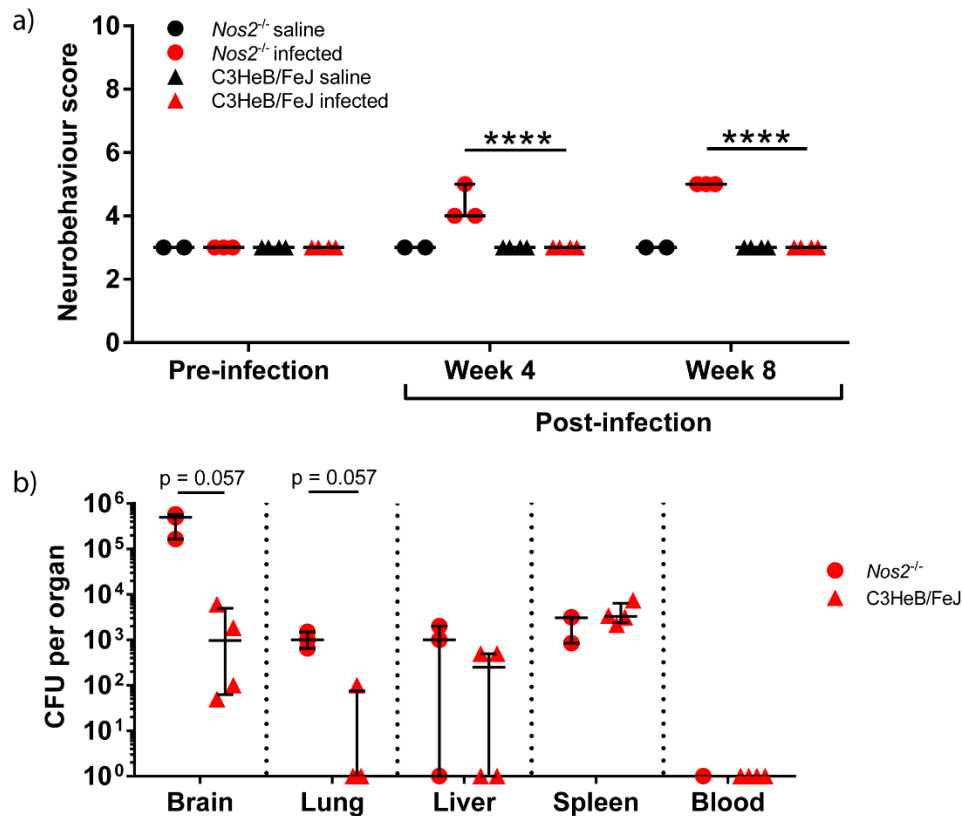

147

148 **Figure 1. *Nos2*<sup>-/-</sup> strain exhibited higher neurobehavioral score and increased *M.tb* CFU in the**  
149 **brain compared to C3HeB/FeJ strain post-i.c.vent. infection.** (a) Neurobehavioral scores were  
150 significantly higher in infected *Nos2*<sup>-/-</sup> mice at 4 and 8 weeks p.i. compared with infected C3HeB/FeJ  
151 mice. Parameters assessed include tremors, twitches and appearance of eyes, with higher  
152 neurobehavioral scores reflecting an increasing severity of neurological deficits. \*\*\*\*\*,  $p < 0.0001$ . (b)  
153 *M.tb* colony forming units (CFU) in the brain and lung of *Nos2*<sup>-/-</sup> is higher compared to C3HeB/FeJ  
154 mice. At day 56 p.i., brain, lung, liver, spleen and blood were processed for enumeration of  
155 mycobacterial load.

156

157

158 Although there were no macroscopic changes in the brain, lung and spleen between the two  
159 mouse strains (Figure 2a), histopathological analysis revealed considerable differences  
160 between these two strains (Figure 2b). Infected *Nos2*<sup>-/-</sup> mice demonstrated more inflammatory

161 cell infiltrate in the brain parenchyma compared to infected C3HeB/FeJ mice. We postulated  
162 that the increase in leukocyte inflammation might be due to increased expression of adhesion  
163 molecules in the brain, and confirmed a significantly higher concentration of ICAM-1 and p-  
164 selectin in infected *Nos2*<sup>-/-</sup> than C3HeB/FeJ mice (Figure 2c and d). Brain concentration of  
165 ICAM-1 and p-selectin were 14-fold ( $p = 0.0089$ ) and 10-fold ( $p = 0.0008$ ) higher in infected  
166 *Nos2*<sup>-/-</sup> compared to C3HeB/FeJ mice.

167

168 Next, we investigated further the mechanism behind the increased immune cell recruitment in  
169 infected *Nos2*<sup>-/-</sup> mice. As TB is characterised by a Th1 inflammatory response, we examined  
170 the concentrations of Th1 cytokines and chemokines. Concentrations of neutrophil  
171 chemoattractants were also profiled as histopathological analysis showed marked neutrophilic  
172 inflammation. Concentrations of Th1-associated inflammatory mediators TNF- $\alpha$  and CXCL-  
173 10 were significantly higher in infected *Nos2*<sup>-/-</sup> mice than infected C3HeB/FeJ mice, while IFN-  
174  $\gamma$  and CCL-5 showed a trend to increase (Figure 3a, b, c and d). Infected *Nos2*<sup>-/-</sup> mice also had  
175 a significantly higher concentration of chemoattractants, CXCL-1, CXCL-2 and LIX, than  
176 infected C3HeB/FeJ mice (Figure 3e, f and g), which may explain the neutrophilic infiltration  
177 in the brain and meninges of *Nos2*<sup>-/-</sup> *M.tb*-infected mice relative to the C3HeB/FeJ *M.tb*-  
178 infected mice. As *Nos2*<sup>-/-</sup> mice displayed a greater severity of CNS-TB disease than C3HeB/FeJ  
179 mice in terms of neurobehavior, histopathology, and immunological profile, the *Nos2*<sup>-/-</sup> mouse  
180 strain was chosen for all subsequent experiments.

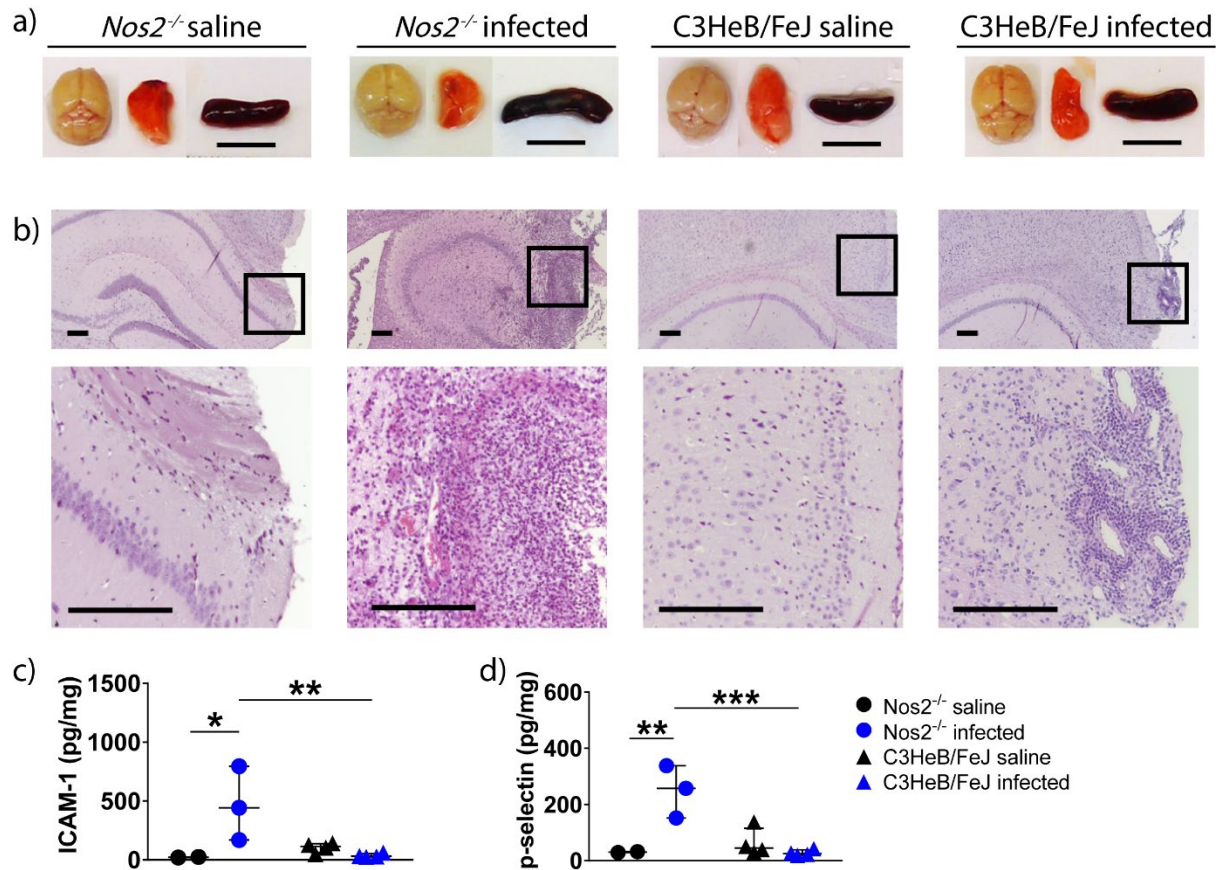

181

182 **Figure 2. *Nos2*<sup>-/-</sup> strain demonstrates more inflammatory cell infiltrate in the brain and meninges**

183 **with increased concentrations of adhesion molecules compared to C3HeB/FeJ strain at 8 weeks**

184 **p.i. (a) Macroscopic assessment of brain, lung and spleen of *M.tb* infected *Nos2*<sup>-/-</sup> and C3HeB/FeJ mice**

185 **were similar to saline controls. Images are representative of 2-4 mice per condition. Scale bar = 1 cm.**

186 **(b) Hematoxylin and eosin (H&E) stain of a representative brain section from each group is shown,**

187 **demonstrating normal brain histology in saline control mice and histopathology in infected mice. High-**

188 **power views (insets) demonstrate more inflammatory cell infiltrate in the brain of infected *Nos2*<sup>-/-</sup>**

189 **compared to C3HeB/FeJ mice. Scale bar = 200 μm. (c and d) Infected *Nos2*<sup>-/-</sup> have increased**

190 **concentrations of (c) ICAM-1 and (d) p-selectin in the brain compared to C3HeB/FeJ mice. Adhesion**

191 **molecule concentrations were normalised to total protein concentration and compared using two-way**

192 **ANOVA with Sidak's multiple comparisons test. Bars represent median and IQR. \*, p < 0.05; \*\*, p <**

193 **0.01; \*\*\*, p < 0.001.**

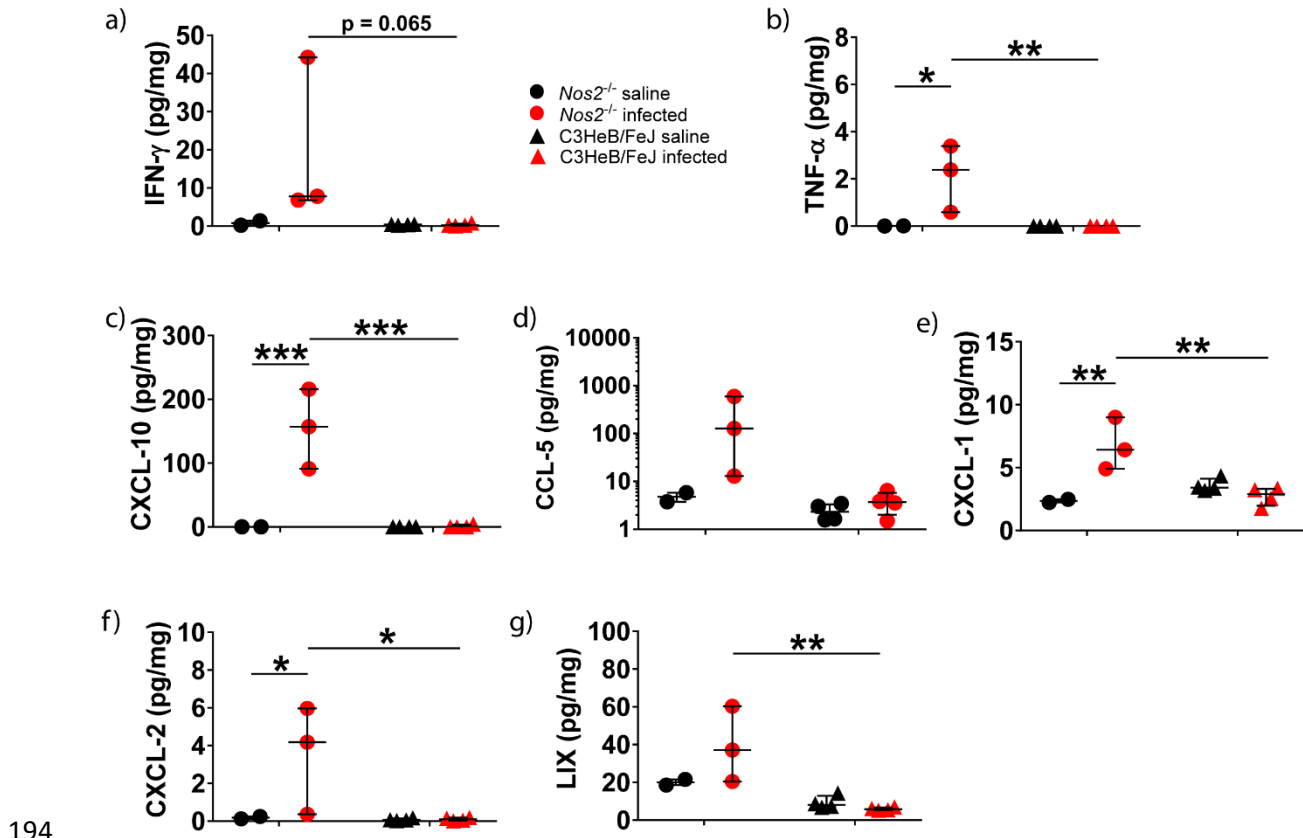

194

195 **Figure 3. I.c.vent.-infected *Nos2*<sup>-/-</sup> mice demonstrated increased concentration of Th1-associated**  
 196 **cytokines and chemokines, and neutrophil chemoattractants compared to C3HeB/FeJ infected**  
 197 **mice at 8 weeks p.i..** Concentrations of chemokines and cytokines in brain homogenates were  
 198 normalised against total protein concentration. Statistical analysis performed using two way ANOVA  
 199 with Sidak's multiple comparisons test. Bars represent median and IQR. \*,  $p < 0.05$ ; \*\*,  $p < 0.01$ ; \*\*\*,  
 200  $p < 0.001$ .

201

202 **I.c.vent. infection by H37Rv *M.tb* strain resulted in a worse neurobehavioral score, earlier**  
203 **mortality and increased mycobacterial load in the brain than CDC1551 *M.tb* strain**

204 We further compared two different *M.tb* strains, H37Rv and CDC1551, on the neurobehavioral  
205 scores and mortality outcomes. At day 28 p.i., infected mice had a significantly lower weight  
206 than saline control, independent of the routes of infection (Figure 4a and Supplementary figure  
207 2a). Within the i.c.vent. group, weight change between H37Rv- and CDC1551-infected mice  
208 were similar throughout the study (Figure 4a). However, within the i.v. group, the weight  
209 change in H37Rv-infected mice at day 28 p.i. was  $-3.6 \pm 3.1\%$  (mean  $\pm$  s.d.) which was  
210 significantly different from CDC1551-infected mice that gained a mean weight of  $6.0 \pm 2.4\%$   
211 ( $p = 0.0027$ ) (Supplementary figure 2a).

212

213 By day 28 p.i., 3 out of 6 (50%) H37Rv i.c.vent.-infected mice were euthanized as they reached  
214 the humane end point, compared to 1 out of 5 (20%) in CDC1551-infected mice (Figure 4b).  
215 As infection progressed, neurological signs in surviving H37Rv i.c.vent. mice worsened with  
216 a higher neurobehavioral score than CDC1551 i.c.vent. mice by week 8 p.i.. Median (IQR)  
217 neurobehavioral score in H37Rv i.c.vent. mice was 5.5 (5-6) as compared to 4 (4-4) in  
218 CDC1551 i.c.vent. infected mice ( $p < 0.0001$ ) (Figure 4c).

219

220 Within the group of i.v.-infected mice, H37Rv *M.tb* also resulted in higher mortality than  
221 CDC1551. *M.tb* H37Rv-infected mice displayed uniform lethality by day 30 p.i., while 100%  
222 survival was observed in CDC1551-infected mice (Supplementary figure 2b). The findings  
223 from the survival curve are also reflected in the neurobehavioral score over time, as CDC1551  
224 i.v. mice displayed mild to no neurological signs at week 8 p.i. (Supplementary figure 2c).

225

226 On gross pathology examination, we found that both H37Rv and CDC1551 i.v.-infected mice  
227 (Supplementary figure 2d) and H37Rv i.c.vent.-infected mice had enlarged spleen relative to  
228 saline controls (Figure 4d), indicating dissemination of infection. CDC1551 i.v.-infected mice  
229 developed macroscopic granulomas in the lungs (Supplementary figure 2d) that was not  
230 observed in other groups. I.v. inoculation of *M.tb*, independent of *M.tb* strains, resulted in a  
231 disseminated infection with granuloma formation in the heart, kidneys, and spleen, which was  
232 not observed in i.c.vent.-infected mice (Supplementary figure 2e). Intra-abdominal abscesses  
233 were also found in one of the H37Rv i.v.-infected mice examined (data not shown). This was  
234 consistent with the blood culture results, where mycobacteraemia was detected in six out of 12  
235 (50%) mice infected by the i.v. route (Supplementary figure 2f). There was no mycobacteremia  
236 in any of the i.c.vent.-infected mice (n = 11) (Figure 4e). H37Rv i.c.vent.-infected mice  
237 demonstrated a trend towards increased *M.tb* load in the brain than CDC1551 i.c.vent., with  
238 median brain CFU count of  $4.3 \times 10^6$  in H37Rv i.c.vent. and  $4.9 \times 10^5$  in CDC1551 i.c.vent.  
239 mice ( $p = 0.052$ ). Interestingly, although no mycobacteremia was found in i.c.vent.-infected  
240 mice, *M.tb* was cultured from the lungs with comparable mycobacterial load in both *M.tb*  
241 strains. Median lung CFU count was  $2.9 \times 10^4$  and  $5.0 \times 10^2$  in H37Rv and CDC1551 i.c.vent.  
242 mice respectively ( $p = 0.33$ ) (Figure 4e). The presence of *M.tb* in the brain was confirmed by  
243 Ziehl-Neelsen staining, with numerous intra- and extra-cellular bacilli within the brain  
244 granulomatous lesion (Figure 4f).

245

246 Collectively, these results showed that H37Rv *M.tb* is more suited than CDC1551 *M.tb* for the  
247 murine CNS-TB model as H37Rv infection resulted in earlier mortality, worse neurobehavioral  
248 score and increased mycobacterial load in the brain compared to CDC1551 infection. I.c.vent  
249 infection also resulted in a more localized infection relative to the widespread dissemination  
250 observed in the i.v-infected mice.



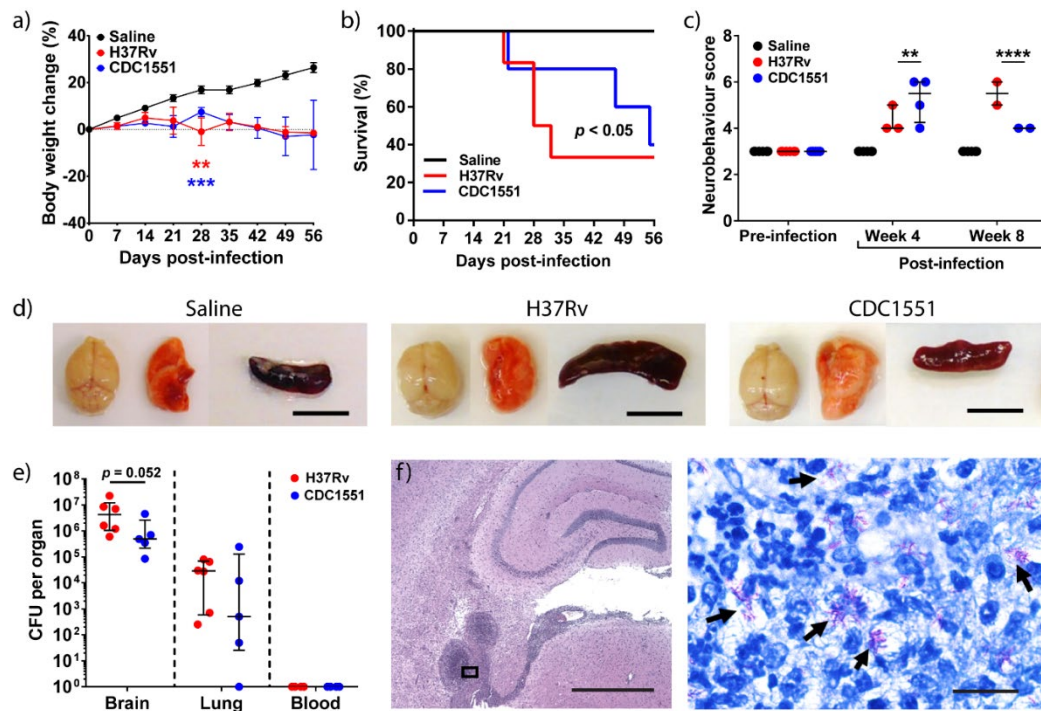

251

252 **Figure 4. I.c.vent. infection with H37Rv resulted in earlier mortality, higher neurobehavioral**  
 253 **score, and increased mycobacterial load in the brain compared to CDC1551.** (a) *M.tb*-infected  
 254 mice lost significantly more weight than saline control. Percentage change in body weight relative to  
 255 initial body weight at day 0 p.i. is shown. Bars represent mean  $\pm$  SEM. \*\*,  $p < 0.01$ ; \*\*\*,  $p < 0.001$ .  
 256 Statistical analysis between H37Rv-infected mice and saline controls in red asterisks, while  
 257 comparisons between CDC1551-infected mice and saline controls in blue asterisks. (b) Kaplan-Meier  
 258 curve shows a significant difference in survival between the groups. (c) H37Rv i.c.vent. demonstrate  
 259 higher neurobehavioral score at 8 weeks p.i. compared to CDC1551 i.c.vent. mice. \*\*,  $p < 0.01$ ; \*\*\*\*,  
 260  $p < 0.0001$ . (d) Gross pathological examination of brain, lung and spleen show no difference between  
 261 saline control and *M.tb*-infected mice except for enlarged spleen in H37Rv i.c.vent.-infected mice. Scale  
 262 bar = 1 cm. (e) H37Rv-infected mice show a trend towards increased *M.tb* load in the brain, while lung  
 263 and blood CFU were comparable to CDC1551-infected mice. Bars represent median and IQR. (f) Low-  
 264 power view of a representative H&E-stained granuloma in the brain of H37Rv i.c.vent. mice. High-  
 265 power view (inset) demonstrates numerous intra- and extracellular acid-fast bacilli (black arrows) by  
 266 Ziehl-Neelson (ZN) stain within the brain granuloma. Scale bars represent 1 mm in H&E stain and 80  
 267  $\mu$ m in ZN stain. 5-6 mice were used per experimental condition.

268 **H37Rv infection via the i.c.vent. route resulted in pyogranuloma formation with**  
269 **increased expression of adhesion molecules relative to the i.v. route.**

270 We next conducted a thorough histological evaluation in *Nos2*<sup>-/-</sup> mice infected with H37Rv via  
271 either the i.v. or i.c.vent. route. Histopathological evaluation demonstrated that i.c.vent.-  
272 infected *Nos2*<sup>-/-</sup> mice developed more severe meningitis and parenchymal granulomas  
273 compared to i.v.-infected mice, independent of *M.tb* strains (Figure 5a-c and Supplementary  
274 figure 3). In the brain, *M.tb*-induced pathological lesions included mononuclear cell (MNC)  
275 inflammation, gliosis, neuronal degeneration, granuloma, pyogranuloma, liquefactive necrosis,  
276 and perivascular cuffing (Supplementary figure 4). Consistent with the more pronounced brain  
277 inflammation, H37Rv i.c.vent.-infected mice had a higher histopathological score than H37Rv  
278 i.v. mice (Table 1). In addition, the meningitis and parenchymal inflammation in the brain of  
279 H37Rv i.c.vent.-infected mice were extensive, extending far beyond the injection site with a  
280 total spread of 2500  $\mu$ m in the anterior-posterior axis (Supplementary figure 5). While all  
281 infected mice developed brain granulomas independent of the routes of infection and *M.tb*  
282 strain, pyogranulomas were only present in i.c.vent.-infected mice. These pyogranulomatous  
283 lesions contained a central area of liquefactive necrosis with abundant degenerated polymorphs  
284 surrounded with MNCs such as macrophages, which were sometimes epithelioid, and  
285 lymphocytes enclosed within a thin layer of fibrous capsule (Figure 5d). These necrotic brain  
286 lesions are a key feature in human CNS-TB patients (Zaharie et al., 2020). In addition, the  
287 presence of neutrophils in CNS tuberculous granulomas was also demonstrated in human brain  
288 biopsies with histologically proven CNS-TB (Ong et al., 2017). Collectively, these results  
289 demonstrate that i.c.vent. infection of *Nos2*<sup>-/-</sup> mice with H37Rv produces a murine CNS-TB  
290 model that resembles human necrotic TB granulomas, and also recapitulates the cellular  
291 architecture of human CNS-TB tuberculomas.

292



293 To analyse the extent of granulomatous inflammation, we measured the number and size of  
294 brain granulomas in each group. H37Rv i.c.vent.-infected mice had significantly more  
295 granulomas which were larger compared to H37Rv i.v.-infected mice (Figure 5e and f). Median  
296 (IQR) granuloma size was 1.18 (0.85-2.18) mm<sup>2</sup> in H37Rv i.c.vent.-infected mice compared  
297 to 0.07 (0.03-0.10) mm<sup>2</sup> in H37Rv i.v.-infected mice ( $p = 0.0022$ ). Analysis of the adhesion  
298 molecules showed that ICAM-1 was significantly increased in i.c.vent.-infected mice relative  
299 to i.v.-infected mice (Figure 5g). P-selectin in H37Rv-infected mice was similarly upregulated  
300 in both routes of infection compared to saline controls ( $p = 0.0022$ ) (Figure 5h). The higher  
301 ICAM-1 expression may explain the increased infiltration of leukocytes which in turn lead to  
302 larger granuloma size in the H37Rv i.c.vent.-infected compared to H37Rv i.v.-infected mice.

303

304 A similar trend was observed for CDC1551 *M.tb* strain. CDC1551 i.c.vent.-infected mice had  
305 a higher histopathological score than i.v.-infected mice (Supplementary Table 1), although the  
306 number of brain granulomas was similar for both routes of infection with this *M.tb* strain  
307 (Supplementary figure 6a). The median (IQR) granuloma size in i.c.vent. route of 0.49 (0.43-  
308 0.74) mm<sup>2</sup> was significantly larger than the i.v. route of 0.06 (0.01-0.17) mm<sup>2</sup> ( $p = 0.0022$ )  
309 (Supplementary figure 6b), with corresponding increase of ICAM-1 expression in the i.c.vent-  
310 infected compared to the i.v.-infected mice (Supplementary 6c). In contrast, p-selectin  
311 expression was lower in the i.c.vent-infected mice (Supplementary 6d).

312

313 These findings again indicated that while i.v.-infected mice were capable of developing CNS-  
314 TB, the i.c.vent route resulted in a more compartmentalized immunopathological response.

315

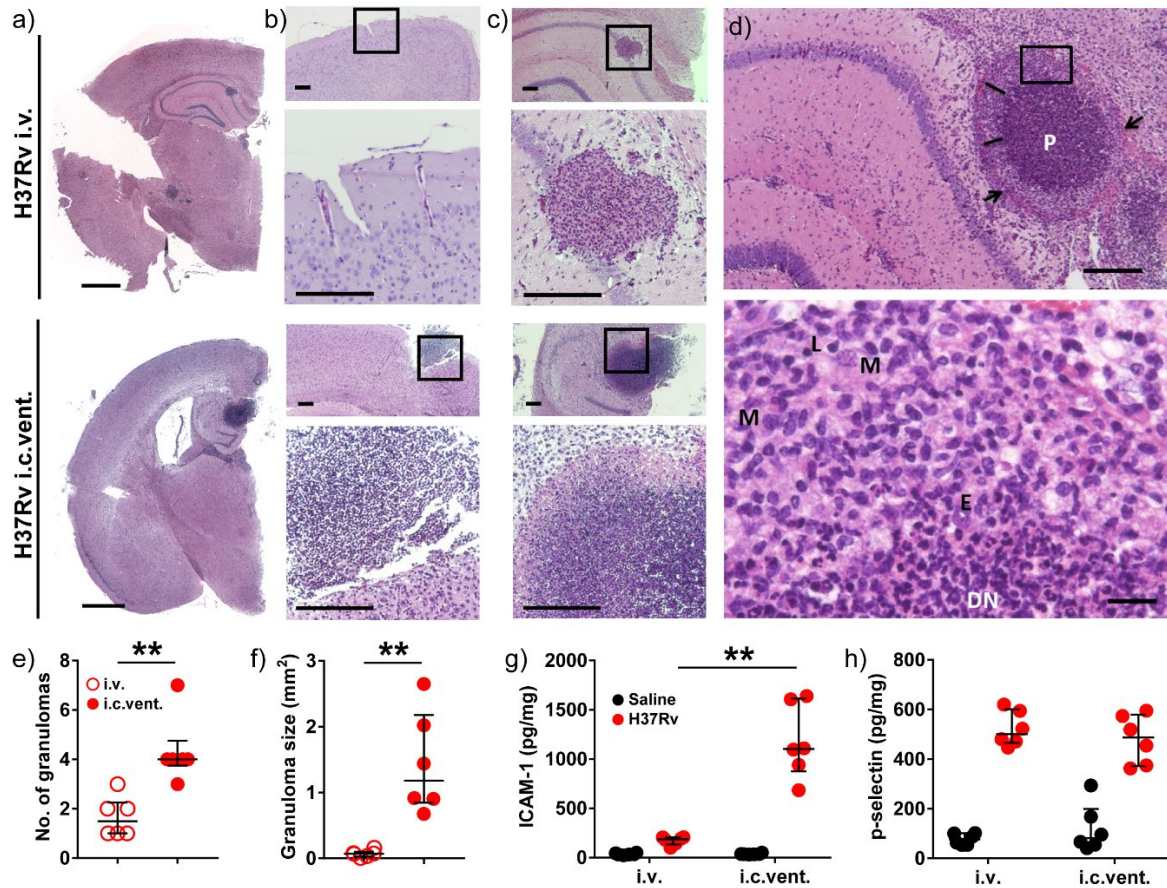

316

317 **Figure 5. *Nos2*<sup>-/-</sup> mice infected with H37Rv by the i.c.vent. route developed pyogranulomas and**  
 318 **larger granulomatous lesions with increased concentrations of ICAM-1 compared to i.v. route. (a)**  
 319 Overall histopathology via H&E stain demonstrate more severe (b) meningitis and (c) parenchymal  
 320 granulomatous inflammation in H37Rv i.c.vent. than H37Rv i.v. mice. Bottom panel: high-power views  
 321 of insets. (a) Scale bar = 1 mm. (b) and (c) Scale bar = 200  $\mu$ m. (d) Well-formed pyogranuloma (P) in  
 322 the hippocampus surrounded with sheets of inflammatory infiltrate (line) and covered with thin fibrous  
 323 capsule (arrow). High-power view (inset) shows presence of degenerating  
 324 neutrophils (DN) at the centre, surrounded with macrophages (M), epithelioid cells (E) and few  
 325 lymphocytes (L). Scale bar = 200  $\mu$ m (20  $\mu$ m in high-power view). Histology is representative of 6  
 326 mice. (e) and (f) H37Rv i.c.vent.- infected mice had more and larger brain granulomas. The number  
 327 and size of granulomas in each group were respectively quantified from 6 different sections of 6 mice.  
 328 H37Rv i.c.vent.-infected mice show higher levels of (g) ICAM-1 compared to i.v.-infected mice,  
 329 whereas (h) p-selectin levels were comparable. Bars represent median and IQR. Statistical analysis was  
 330 conducted using Mann-Whitney test. \*\*,  $p < 0.01$ .

331 **Table 1. Histopathological evaluation of *M.tb*-induced lesions in H37Rv-infected mice**

| Lesions*                                 | H37Rv i.v. |   |   |   | H37Rv i.c.vent. |   |   |   |
|------------------------------------------|------------|---|---|---|-----------------|---|---|---|
|                                          | M          | C | H | T | M               | C | H | T |
| Inflammation (MNCs)                      | 0          | 0 | 0 | 0 | 1               | 3 | 2 | 0 |
| Perivascular cuffing                     |            | 0 | 0 | 0 |                 | 3 | 2 | 2 |
| Gliosis                                  |            | 1 | 1 | 0 |                 | 3 | 1 | 0 |
| Granuloma                                |            | 1 | 2 | 0 |                 | 2 | 0 | 0 |
| Pyrogranuloma                            |            | 0 | 0 | 0 |                 | 4 | 3 | 0 |
| Neuronal degeneration/necrosis           |            | 0 | 0 | 0 |                 | 2 | 1 | 0 |
| Liquefactive necrosis (+/-) <sup>§</sup> |            | + | + | - |                 | + | + | - |
| Presence of bacilli (+/-) <sup>§</sup>   | -          | - | + | - | -               | + | + | - |

332 M: meninges; C: cerebral cortex; H: hippocampus; T: thalamus

333 \*Severity of lesions in each group are scored on a scale of 0–5: 0 – no abnormalities detected; 1 –  
 334 minimal; 2 – mild; 3: moderate; 4: marked; 5: severe. The average score of 5–6 mice per group is shown.

335 <sup>§</sup>+/-: present/absent

336

337 **H37Rv i.c.vent.-infected mice have higher expression of pro-inflammatory cytokines, Th1**  
338 **chemokines and neutrophil chemoattractants**

339 Inflammatory cytokines found upregulated in the CSF of TBM patients included TNF- $\alpha$ , IFN-  
340  $\gamma$ , IL-1 $\beta$  and IL-6 (Misra et al., 2010; Nagesh Babu, Kumar, Kalita, & Misra, 2008). To  
341 determine if our model has a similar CNS immunological phenotype as human TBM patients,  
342 we analysed the expression of pro-inflammatory cytokines in the brain.

343

344 Pro-inflammatory cytokines TNF- $\alpha$ , IFN- $\gamma$ , IL-1 $\beta$  and IL-6 were significantly increased by  
345 17.8-fold, 31.0-fold, 4.8-fold and 7.1-fold, respectively in H37Rv i.c.vent. compared to H37Rv  
346 i.v.-infected mice (Figure 6a-d; all  $p < 0.01$ ), and were observed in both *M.tb* strains  
347 (Supplementary Figure 7a-d). In addition, H37Rv i.c.vent.-infected mice demonstrated 31.7-  
348 fold, 7.3-fold, 6.2-fold and 56.8-fold higher expression of Th1 chemokines CCL-3, -4, -5 and  
349 CXCL-10 than H37Rv i.v.-infected mice respectively (Figure 6e-h; all  $p < 0.01$ ). This was also  
350 observed with the CDC1551 strain (Supplementary Figure 7e-h). The higher concentration of  
351 pro-inflammatory cytokines and Th1 chemokines in i.c.vent. mice may explain the more  
352 pronounced inflammation and greater extent of inflammatory cell infiltration around cerebral  
353 blood vessels in i.c.vent.-infected compared to i.v.-infected mice.

354

355 Neutrophil chemokines CXCL-1, CXCL-2 and LIX were upregulated by 1.4-fold, 35.6-fold and  
356 5.2-fold, respectively in H37Rv i.c.vent.-infected than H37Rv i.v.-infected mice (Figure 6i-k).  
357 While CXCL-1 expression was similar between the two infection routes of CDC1551-infected  
358 mice, CDC1551 i.c.vent. mice had higher expression of CXCL-2 and LIX than CDC1551 i.v.  
359 mice (Supplementary figure 7i-k). The significantly higher expression of neutrophil  
360 chemoattractants in i.c.vent.-infected mice, independent of *M.tb* strains, may explain the

361 presence of pyogranulomas with marked neutrophilic infiltration in i.c.vent.- but not i.v.-  
362 infected mice.

363

364 Collectively, these immunological findings indicate that i.c.vent. infection of *Nos2*<sup>-/-</sup> mice with  
365 H37Rv strain creates a better CNS-TB model than the i.v. route of infection as it exhibited  
366 more pronounced brain inflammation as shown by the higher expression of pro-inflammatory  
367 cytokines, Th1 chemokines and neutrophil chemoattractants.

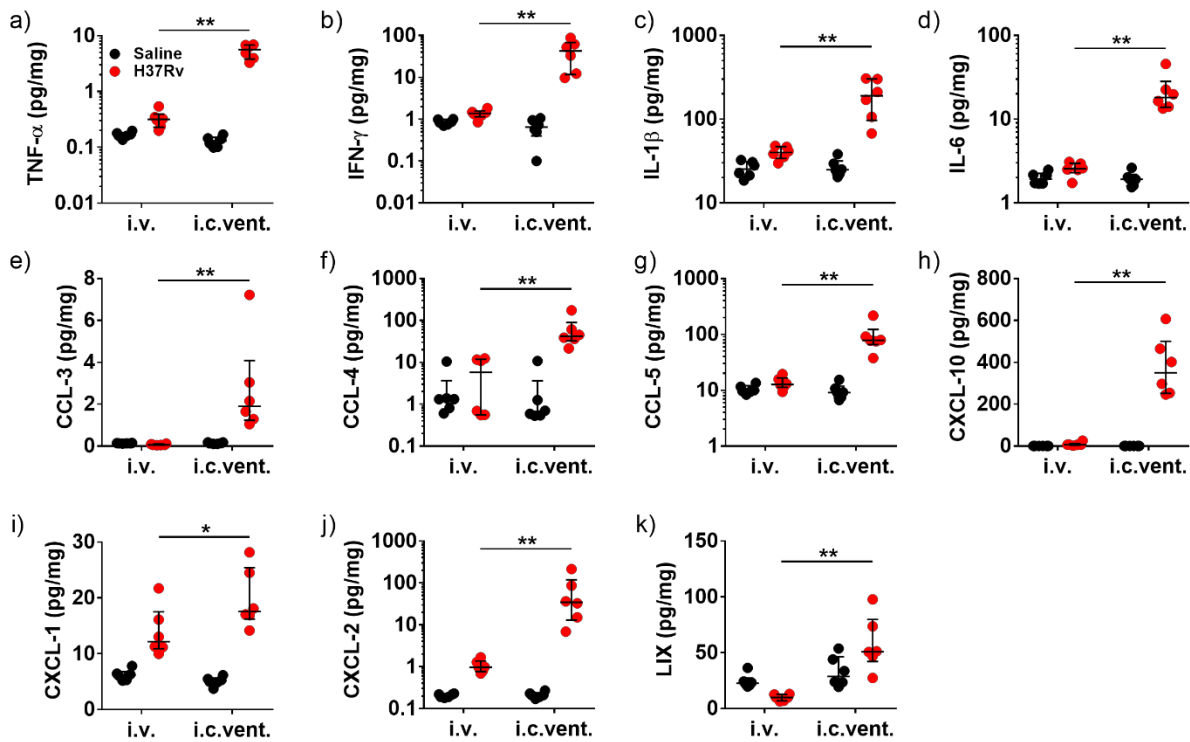

368

369 **Figure 6. H37Rv infection by the i.c.vent. route resulted in significantly higher brain expression**  
370 **of inflammatory mediators than the i.v. route.** H37Rv i.c.vent.-infected mice had higher  
371 concentrations of (a-d) pro-inflammatory cytokines, (e-h) Th1 chemokines, and (i-k) neutrophil  
372 chemoattractants than H37Rv i.v. mice. Concentrations of inflammatory mediators in the brain were  
373 measured after day 21 p.i.. Concentration of each immunological marker was normalised against the  
374 total protein concentration. Bars represent median and interquartile ranges. Statistical analysis was  
375 conducted using Mann-Whitney test. \*,  $p < 0.05$ ; \*\*,  $p < 0.01$ .

376

377 **DISCUSSION**

378 Human CNS TB is severe and progress is limited by lack of good animal model systems that  
379 reflect immunopathology in human CNS TB. Our study determined the effects of mouse strain,  
380 *M.tb* strain and route of infection on the development of a murine CNS-TB model with human-  
381 like pathology. Here, we show that i.c.vent. infection of *Nos2*<sup>-/-</sup> mice with *M.tb* H37Rv makes  
382 a CNS-TB model that shares similar clinical features of human CNS-TB, including  
383 neurological morbidity, high mortality, and increased CNS expression of inflammatory  
384 mediators. Importantly, our model demonstrated histological evidence of parenchymal  
385 granulomas in the cerebral cortex, hippocampus and the presence of necrotizing granulomas  
386 similar to human CNS-TB tuberculomas (Chatterjee, 2011; P. R. Donald & Schoeman, 2009).  
387 The presence of a central area of liquefactive necrosis in pyogranulomas of H37Rv i.c.vent.-  
388 infected mice resembled human caseating tuberculomas with central liquefaction, a clinical  
389 feature that has not yet been replicated in existing murine CNS-TB models. Other features of  
390 human CNS-TB include perivascular infiltration with immune cells and a microglial reaction  
391 (Chatterjee, 2011; Saez-Llorens, Ramilo, Mustafa, Mertsola, & McCracken, 1990). Similar to  
392 that observed in humans, our CNS-TB model showed the presence of gliosis and perivascular  
393 cuffing throughout the brain parenchyma.

394

395 We evaluate the simultaneous expression of adhesion molecules, chemokines, and cytokines  
396 in an attempt to elucidate the mechanism underlying the chronic inflammatory state in human  
397 CNS-TB. While several clinical studies have unanimously demonstrated an increased CSF  
398 expression of inflammatory cytokines TNF- $\alpha$ , IFN- $\gamma$ , IL-1 $\beta$  and IL-6 in TBM patients (Misra  
399 et al., 2010; Nagesh Babu et al., 2008; Sharma et al., 2017), current murine CNS-TB models  
400 have failed to recapitulate this immunological profile (Be et al., 2008; van Well et al., 2007).



401 Through immunological analysis, we showed that H37Rv i.c.vent.-infected *Nos2*<sup>-/-</sup> mice had  
402 significantly increased expression of TNF- $\alpha$ , IFN- $\gamma$ , IL-1 $\beta$  and IL-6, similar to human TBM  
403 patients (Misra et al., 2010; Nagesh Babu et al., 2008), indicating that our pre-clinical model  
404 mirrors human CNS-TB. In addition, we demonstrated H37Rv i.c.vent.-infected mice exhibited  
405 upregulation of adhesion molecules p-selectin and ICAM-1 compared to saline controls, in  
406 keeping with the increased leukocyte infiltration in the brain and extends previous *in vitro*  
407 observations that *M.tb* increases expression of endothelial adhesion molecules in a co-culture  
408 BBB model (Brilha et al., 2017).

409

410 While i.c.vent. infection of *Nos2*<sup>-/-</sup> mice with either *M.tb* H37Rv or CDC1551 resulted in a high  
411 mortality (67% and 60% respectively), similar to human CNS-TB (Karstaedt, Valtchanova,  
412 Barriere, & Crewe-Brown, 1998; Porkert, Sotir, Parrott-Moore, & Blumberg, 1997), H37Rv is  
413 superior to CDC1551 as the murine CNS-TB model for two reasons. Firstly, H37Rv infection  
414 resulted in the development of more severe neurological deficits with a worse neurobehavioral  
415 score and earlier mortality than CDC1551 infection, which reflected the neurological morbidity  
416 and severity of disease in human CNS-TB (Christensen, Andersen, Thomsen, Andersen, &  
417 Johansen, 2011; Shaw, Pasipanodya, & Gumbo, 2010). Secondly, H37Rv-infected mice  
418 showed an increased severity of histopathological lesions than CDC1551-infected mice,  
419 demonstrated by the greater extent of pyogranulomas and liquefactive necrosis in H37Rv  
420 i.c.vent. mice, extending from the cerebral cortex to the hippocampus which were not observed  
421 in CDC1551-infected mice, but similar to human CNS-TB histology (Zaharie et al., 2020).  
422 This is consistent with previous findings where H37Rv is more virulent than CDC1551 in  
423 animal models of pulmonary TB both in rabbits (Bishai et al., 1999) and in mice (Manca et al.,  
424 1999).



425

426 Previous murine CNS-TB models have employed direct injection into the brain parenchyma to  
427 induce CNS infection (Mazzolla et al., 2002; Olin et al., 2008; Zucchi et al., 2012), which  
428 resulted either in granulomas being restricted to the injection site with no widespread  
429 inflammation or the absence of granulomas. Thus, to better mimic the rupture of the Rich foci  
430 in human CNS-TB, with the subsequent release of *M.tb* into the CSF to induce TBM (Rock et  
431 al., 2008), we inoculated *M.tb* into the third ventricle for meningeal infection. To prevent  
432 surgery-related loss of mice due to excessive bleeding or hemorrhage, we injected *M.tb* at an  
433 angle into the third ventricle to avoid puncturing the superior sagittal sinus. In addition to the  
434 direct CNS inoculation of *M.tb* via the i.c.vent. route, we also explored the i.v. route to mimic  
435 the natural course of hematogenous spread from the lung to the brain in human CNS-TB  
436 (Sanchez-Garibay, Hernandez-Campos, Tena-Suck, & Salinas-Lara, 2018). However, we  
437 found the i.v. route of infection to be less suited for our murine CNS-TB model, as the mice  
438 exhibited a widespread disseminated infection resembling miliary TB, with granulomas  
439 observed in multiple organs of the lungs, spleen, heart, and kidneys, but not typical brain  
440 lesions. Dissemination of *M.tb* to the heart of H37Rv i.v. mice may explain the early and  
441 uniform lethality with mortality of these mice by day 30 p.i..

442

443 Different mouse strains have different susceptibilities to *M.tb* infection, which may explain the  
444 varying degree of disease and brain histopathology in existing murine CNS-TB models. To  
445 investigate whether the C3HeB/FeJ mice, which are hypersusceptible to pulmonary TB  
446 infection (Irwin et al., 2015; Kramnik et al., 2000), or the *Nos2*<sup>-/-</sup> mice, which have an altered  
447 innate immune response, are more susceptible to CNS-TB infection, we evaluated the  
448 C3HeB/FeJ and *Nos2*<sup>-/-</sup> mouse strains for our murine CNS-TB model. *M.tb*-infected *Nos2*<sup>-/-</sup>

449 mice exhibited worse neurobehavioral score than C3HeB/FeJ mice and developed neurological  
450 symptoms such as myoclonic jerks and limb weakness that resembled seizures and hemiparesis  
451 respectively in human CNS-TB patients (Rock et al., 2008). In addition, infected *Nos2*<sup>-/-</sup> mice  
452 demonstrated greater inflammatory cell infiltrates, higher expression of adhesion molecules  
453 and chemokines in the brain than C3HeB/FeJ mice. Although there was trend to lower  
454 mycobacterial load in the C3HeB/FeJ mice, these infected mice expressed similar level of  
455 adhesion molecules and chemokines in the brain to saline controls, indicating that the CNS  
456 response to infection in the C3HeB/FeJ mice was minimal. These findings show that *Nos2*<sup>-/-</sup>  
457 mice is a better CNS-TB model than C3HeB/FeJ mice, and underscores the role of *Nos2*-  
458 induced NO production in inhibiting *M.tb* growth in mice (Dallenga et al., 2018).

459

460 Altogether, i.c.vent. infection of *Nos2*<sup>-/-</sup> mice with H37Rv creates a murine CNS-TB model  
461 that best resembled human CNS-TB immunopathology, exhibiting the worst neurobehavioral  
462 score and with a high and early mortality reflecting disease severity and its associated  
463 neurological morbidity. In our study, extensive brain inflammation was seen with granulomas  
464 and pyogranulomas that resembled the granulomatous inflammation in human CNS-TB  
465 patients (Zaharie et al., 2020), with a corresponding increase in expression of adhesion  
466 molecules, Th1 cytokine response and neutrophil chemoattractants. As this model replicates  
467 the histopathological features of human CNS-TB, it is particularly useful for future drug studies  
468 to assess the penetration of potential drug candidates into CNS-TB tuberculomas, and evaluate  
469 their efficacy in reducing immunopathology and consequently improve neurological outcome  
470 in CNS-TB.

471

## 472 MATERIALS AND METHODS

473 All animal procedures were approved by the Institutional Animal Care and Use Committee of  
474 National University of Singapore under protocol R15-1068, in accordance with national  
475 guidelines for the care and use of laboratory animals for scientific purposes.

476

### 477 Bacterial strains and growth conditions for infection

478 *Mycobacterium tuberculosis* (*M.tb*) strains H37Rv and CDC1551 were kindly provided by  
479 Professor Nick Paton and Associate Professor Sylvie Alonso (both NUS, Singapore)  
480 respectively. For infection experiments, a frozen vial of *M.tb* was thawed and cultured to mid-  
481 logarithmic phase at an optical density of 0.6-0.8. Prior to infection, the *M.tb* was centrifuged  
482 at 3,200 x g for 10 minutes and resuspended in 1 mL sterile 0.9% NaCl. The *M.tb* inoculum  
483 was then plated to determine the dose of infection.

484

### 485 Mouse cannula implantation and infection

486 Six- to eight-week-old male C57BL/6 *Nos2*<sup>-/-</sup> and C3HeB/FeJ mice (Jackson Laboratory, Bar  
487 Harbor, Maine) were used for intra-cerebroventricular (i.c.vent.) or intravenous (i.v.) infection.  
488 Mice in the i.c.vent. group were cannulated one week before infection. An illustration of the  
489 stereotaxic coordinates of site of injection and the positioning of guide cannula is shown in  
490 Supplementary Figure 1a. A motorized stereotaxic instrument (Neurostar, Tübingen, Germany)  
491 was used to implant a 26-gauge guide cannula (RWD, Shenzhen, China) into the third ventricle  
492 (coordinates from the bregma: -1.6 mm posterior, 0 mm lateral, -2.5 mm ventral). Mice were  
493 injected with 0.5 µL of sterile 0.9% NaCl or  $2 \times 10^8$  CFU/mL *M.tb* through the brain cannula  
494 (over 5 min) using the syringe pump (Harvard Apparatus, Holliston, Massachusetts). Mice in  
495 the i.v. group were injected with 50 µL of sterile 0.9% NaCl or  $2 \times 10^6$  CFU/mL *M.tb* via the

496 retro-orbital sinus. All mice were observed for mortality and weight change. Humane endpoints  
497 included  $\geq 20\%$  weight loss, complete hind limb paralysis and repeated seizures. Infected mice  
498 were also monitored daily for 56 days after infection for clinical signs indicative of CNS-TB,  
499 such as limb weakness, tremors, and twitches.

500

501 Trypan blue was administered into four cannulated mice and the brains harvested 15 mins post-  
502 administration to allow for distribution of the dye in both right and left cerebral hemispheres.  
503 A sagittal illustration of the ventricular system in the mouse brain, which include the lateral  
504 ventricles, third ventricle and aqueduct that leads to the fourth ventricle, is depicted in  
505 Supplementary Figure 1b. Coronal sections of each brain verifies that the dye is in the  
506 ventricular system (Supplementary figure 1c), indicating successful brain cannulation into the  
507 third ventricle. *Nos2*<sup>-/-</sup> or C3HeB/FeJ mice were infected with *M.tb* 7 days after brain  
508 cannulation, and the blood, brain, lungs, liver and spleen were harvested 56 days post-infection  
509 (p.i.) for enumeration of mycobacterial load, histopathological analysis and immunological  
510 marker analysis (Supplementary figure 1d).

511

## 512 **Neurobehavioral scoring**

513 Neurobehavioral scoring was performed by a researcher (P.X.Y.) blinded to the route of  
514 infection and strain of *M.tb* according to a scoring list for CNS-TB mouse model (Table 2),  
515 adapted from Tucker et al (Tucker et al., 2016). Each scoring parameter ranged from one,  
516 corresponding to no abnormalities, to a variable maximum score. The minimum total score is  
517 3 indicating a normal mouse. Higher neurological scores reflect an increasing severity of  
518 neurological deficits with a maximum total score of 7.

519

520 **Table 2. Composite neurobehavioral score criteria for CNS-TB mouse model**

| <b>Criteria</b>              | <b>Score</b> |
|------------------------------|--------------|
| <b>Tremors</b>               |              |
| Absent                       | 1            |
| Present                      | 2            |
| <b>Twitch/jerk</b>           |              |
| Absent                       | 1            |
| Mild (< 3 in 10 sec)         | 2            |
| Severe ( $\geq$ 3 in 10 sec) | 3            |
| <b>Eyes</b>                  |              |
| Normal                       | 1            |
| Closed eyelids               | 2            |

521

### 522 **Organ harvesting and processing**

523 Eight weeks post-infection, mice were deeply anesthetized before cardiac puncture was  
524 performed for blood collection. The brain, lungs, liver and spleen were harvested and the gross  
525 pathology examined before tissue processing. Half of each organ was fixed in 10% neutral  
526 buffered saline for histology, while the other half was homogenized for bacterial enumeration  
527 and characterization of immunological markers. Organs were homogenized by high-speed  
528 shaking in 2 mL microcentrifuge tubes filled with sterile PBS and 5/7 mm stainless steel beads  
529 using TissueLyser LT (Qiagen, Hilden, Germany).

530

### 531 **Histopathological analysis**

532 Histopathology was performed on the left hemisphere of the brain. The murine brain was fixed  
533 in 10% neutral buffered saline, paraffin embedded and sectioned to 4  $\mu$ m thickness. Brain slices  
534 were stained with hematoxylin-eosin (H&E) (Vector Laboratories, Burlingame, California) to  
535 characterise pathological lesions and Ziehl-Neelson staining (Sigma-Aldrich, St. Louis,  
536 Missouri) to detect mycobacterium according to manufacturer's instructions. Histopathological  
537 examination was carried out in a blinded fashion by a histopathologist (R.R.) based on the  
538 presence of pathological changes including inflammation, perivascular cuffing, gliosis,

539 neuronal necrosis, granuloma, pyogranuloma and necrosis. Definition of granulomatous  
540 lesions in this study includes both granulomas and pyogranulomas. Grading of severity was  
541 assigned on the following scale: 0: no abnormalities detected; 1-minimal; 2-mild; 3-moderate;  
542 4-marked & 5-severe. The total number and area of granulomatous lesions were measured from  
543 6 different sections of 5-6 mice. To quantify the area of granuloma, we utilized the free-hand  
544 tool in ImageJ (NIH, Bethesda, Maryland) and manually demarcated the granuloma as a region  
545 of interest for area measurement.

546

### 547 **Immunological marker analysis**

548 Adhesion molecules, cytokines and chemokines were analysed by Fluorokine multianalyte  
549 profiling kit according to the manufacturer's protocol (R&D Systems, Minneapolis, Minnesota)  
550 on the Bio-Plex 200 platform (Bio-Rad, Hercules, California). The minimum detection limit  
551 for the ICAM-1 and p-selectin were 52.7 pg/ml and 2.6 pg/ml respectively. The minimum  
552 detection limit for the cytokines and chemokines were CCL-2/MCP-1 134 pg/ml, CCL-3/MIP-  
553 1 $\alpha$  0.452 pg/ml, CCL-4/ MIP-1 $\beta$  77.4 pg/ml, CCL-5/ RANTES 19.1 pg/ml, CCL-7/ MCP-3  
554 1.69 pg/ml, CCL-8/ MCP-2 0.283 pg/ml, CCL-11/Eotaxin 1.46 pg/m, CCL-12/ MCP-5 0.613  
555 pg/ml, CCL-19/ MIP-3 $\beta$  2.28 pg/ml, CCL-20/ MIP-3 $\alpha$  3.95 pg/ml, CCL-22/ MDC 0.965 pg/ml,  
556 CXCL-1/ KC 32.9 pg/ml, CXCL-2/ MIP-2 1.97 pg/ml, CXCL-10/ IP-10 6.85 pg/ml, CXCL-  
557 13/ BLC 19.3 pg/ml, IL-1 $\alpha$  8.17 pg/ml, IL-1 $\beta$  41.8 g/ml, IL-6 2.30 pg/ml, IL-12 p70 12.8 pg/ml,  
558 IL-17A 7.08 pg/ml, IL-27 1.84 pg/ml, LIX 2.02 pg/ml, TNF- $\alpha$  1.47 pg/ml, IFN- $\gamma$  1.85 pg/ml.  
559 Brain homogenates were assayed at neat for all analytes and results were normalised to their  
560 total protein concentrations (Bio-Rad, Hercules, California).

561

### 562 **Statistical analysis**

563 Continuous variables are presented as medians and interquartile range. Neurobehavior scores  
564 between groups were compared using two-way ANOVA with post-hoc Tukey's multiple  
565 comparisons test. Levels of adhesion molecules, cytokines and chemokines, and CFU counts  
566 between groups were compared using Mann-Whitney test. Comparison of survival curves  
567 between groups was calculated using the log-rank test. A two-sided value of  $p < 0.05$  was  
568 considered significant. All analyses were performed using GraphPad Prism version 7.05  
569 (Graphpad, San Diego, California).

570

571 **Supplementary table 1. Histopathological evaluation of *M.tb*-induced lesions in CDC1551-**  
 572 **infected mice**

| Lesions*                                 | CDC1551 i.v. |   |   |   | CDC1551 i.c.vent. |   |   |   |
|------------------------------------------|--------------|---|---|---|-------------------|---|---|---|
|                                          | M            | C | H | T | M                 | C | H | T |
| Inflammation (MNCs)                      | 0            | 0 | 0 | 0 | 3                 | 3 | 1 | 0 |
| Perivascular cuffing                     |              | 0 | 0 | 0 |                   | 2 | 2 | 1 |
| Gliosis                                  |              | 0 | 0 | 0 |                   | 2 | 1 | 0 |
| Granuloma                                |              | 0 | 1 | 0 |                   | 2 | 0 | 0 |
| Pyrogranuloma                            |              | 0 | 0 | 0 |                   | 3 | 0 | 0 |
| Neuronal degeneration/necrosis           |              | 0 | 0 | 0 |                   | 2 | 1 | 0 |
| Liquefactive necrosis (+/-) <sup>§</sup> |              | - | - | - |                   | + | - | - |
| Presence of bacilli (+/-) <sup>§</sup>   | -            | - | + | - | -                 | + | - | - |

573 M: meninges; C: cerebral cortex; H: hippocampus; T: thalamus

574 \*Severity of lesions in each group are scored on a scale of 0–5: 0 – no abnormalities detected; 1 –  
 575 minimal; 2 – mild; 3: moderate; 4: marked; 5: severe. The average score of 5–6 mice per group is shown.

576 <sup>§</sup>+/-: present/absent

577



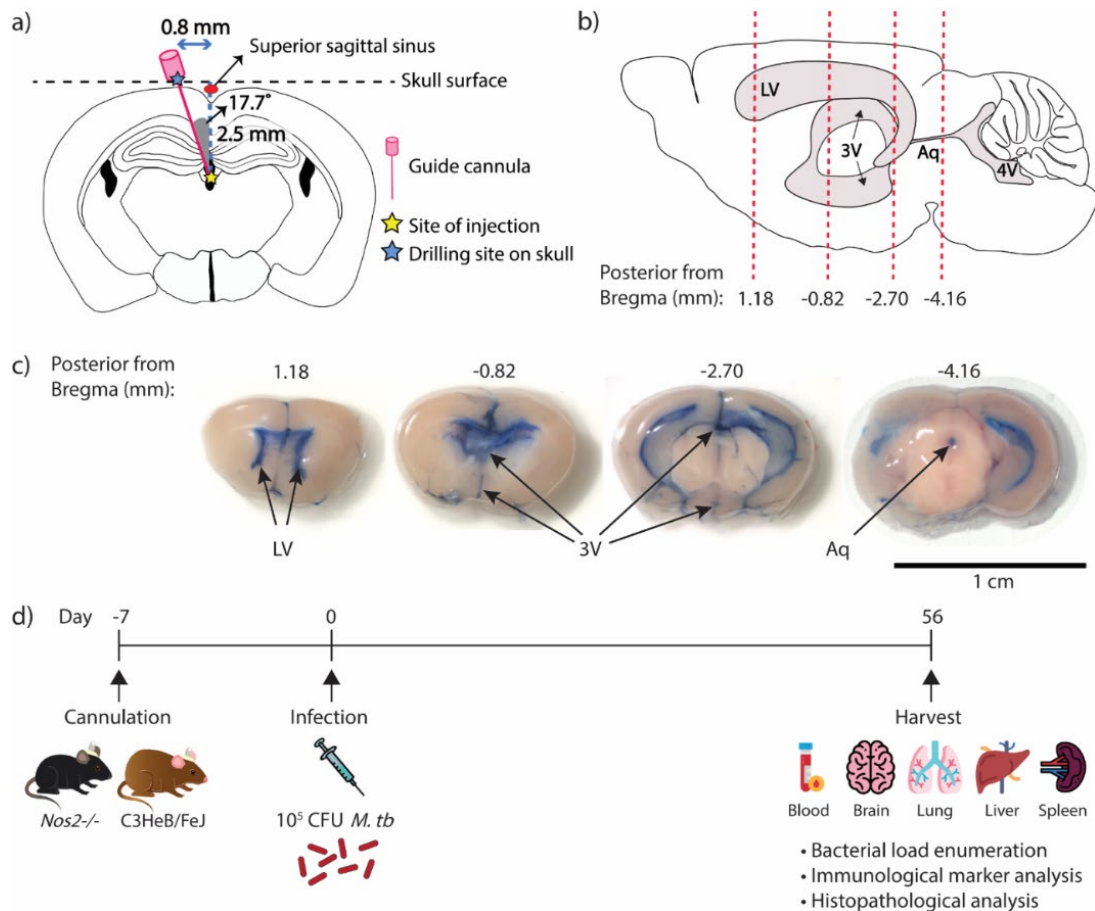

578

579 **Supplementary figure 1. Cannula implantation and experimental timeline.** (a) A schematic

580 representation (coronal section) of the angled cannulation conducted for injection in the third ventricle.

581 Stereotaxic coordinates for injection site from bregma: -1.60 mm posterior, 0 mm lateral, -2.50 mm

582 ventral. Coordinates for drilling site on skull from bregma: -1.60 mm posterior, 0.80 mm lateral (left).

583 Guide cannula is inserted at an angle of 17.7°.

584 (b) A schematic representation (sagittal section) of the

585 ventricular system in the mouse brain showing the approximate positions of the lateral ventricle (Zucchi

586 et al.), third-ventricle (3V), fourth-ventricle (4V) and aqueduct (Aq). The 4 dotted lines indicate the

587 approximate location of the brain images shown in (c) with the stereotaxic coordinates posterior from

588 Bregma annotated below. (c) Images of coronal sections of the brain after trypan blue dye

589 administration. If cannula is successfully implanted in the third ventricle, the trypan blue dye will be

590 distributed throughout the ventricular system as demonstrated in the four brain coronal sections. Images

591 shown are representative of four cannulated mice. (d) A schematic representation of the experimental

592 timeline for mice infected with *Mycobacterium tuberculosis* (*M.tb*) via the intra-cerebroventricular

593 route.

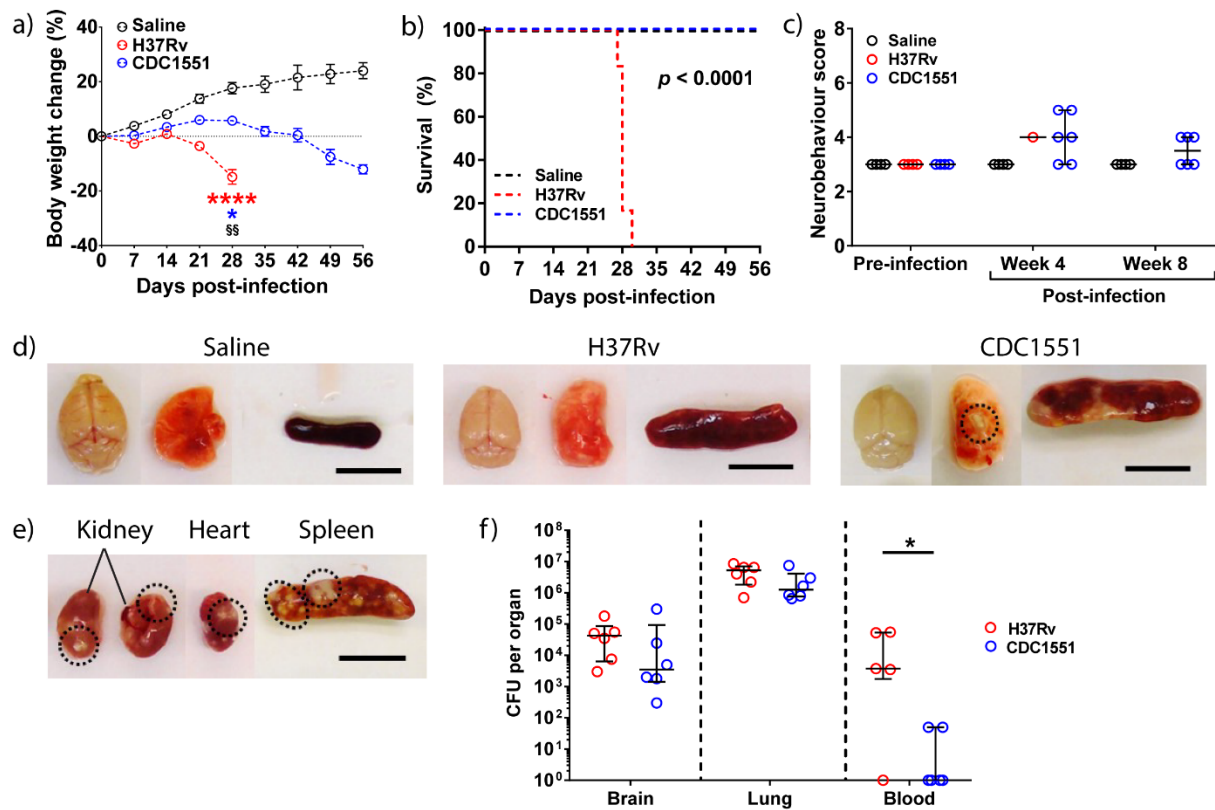

593

594 **Supplementary figure 2. *Nos2*<sup>-/-</sup> mice infected with *M.tb* via the i.v. route demonstrate**

595 **disseminated granulomas with mycobacteraemia in 50% of mice.** (a) *M.tb*-infected mice lost

596 significantly more weight than saline control. At day 28 p.i., H37Rv i.v. mice lost more weight than

597 CDC1551 i.v. mice (§§). Percentage change in body weight relative to initial body weight at day 0 p.i.

598 is shown. Bars represent mean ± SEM. \*,  $p < 0.05$ ; §§,  $p < 0.01$ ; \*\*\*\*,  $p < 0.0001$ . Statistical analysis

599 between H37Rv-infected mice and saline controls in red asterisks, while comparisons between

600 CDC1551-infected mice and saline controls in blue asterisks. (b) Kaplan-Meier curve shows a

601 significant difference in survival between the groups. (c) I.v.-infected mice demonstrate similar

602 neurobehavioral score at 4 weeks p.i.. No data is available for H37Rv i.v. at 8 weeks p.i. as all mice

603 died or reached humane endpoints by day 30 p.i.. (d) CDC1551 i.v.-infected mice developed

604 granulomas (circled) in the lungs. Gross pathological examination of the brain, lung and spleen 21 days

605 after infection. Images are representative of 5-6 mice per condition. (e) Granulomas (circled) are present

606 in the kidneys, heart and spleen of i.v.-infected mice. Scale bars represent 1 cm. (f) H37Rv-infected

607 mice demonstrate increased mycobacteraemia, while brain and lung CFU were comparable to

608 CDC1551-infected mice. Bars represent median and IQR.

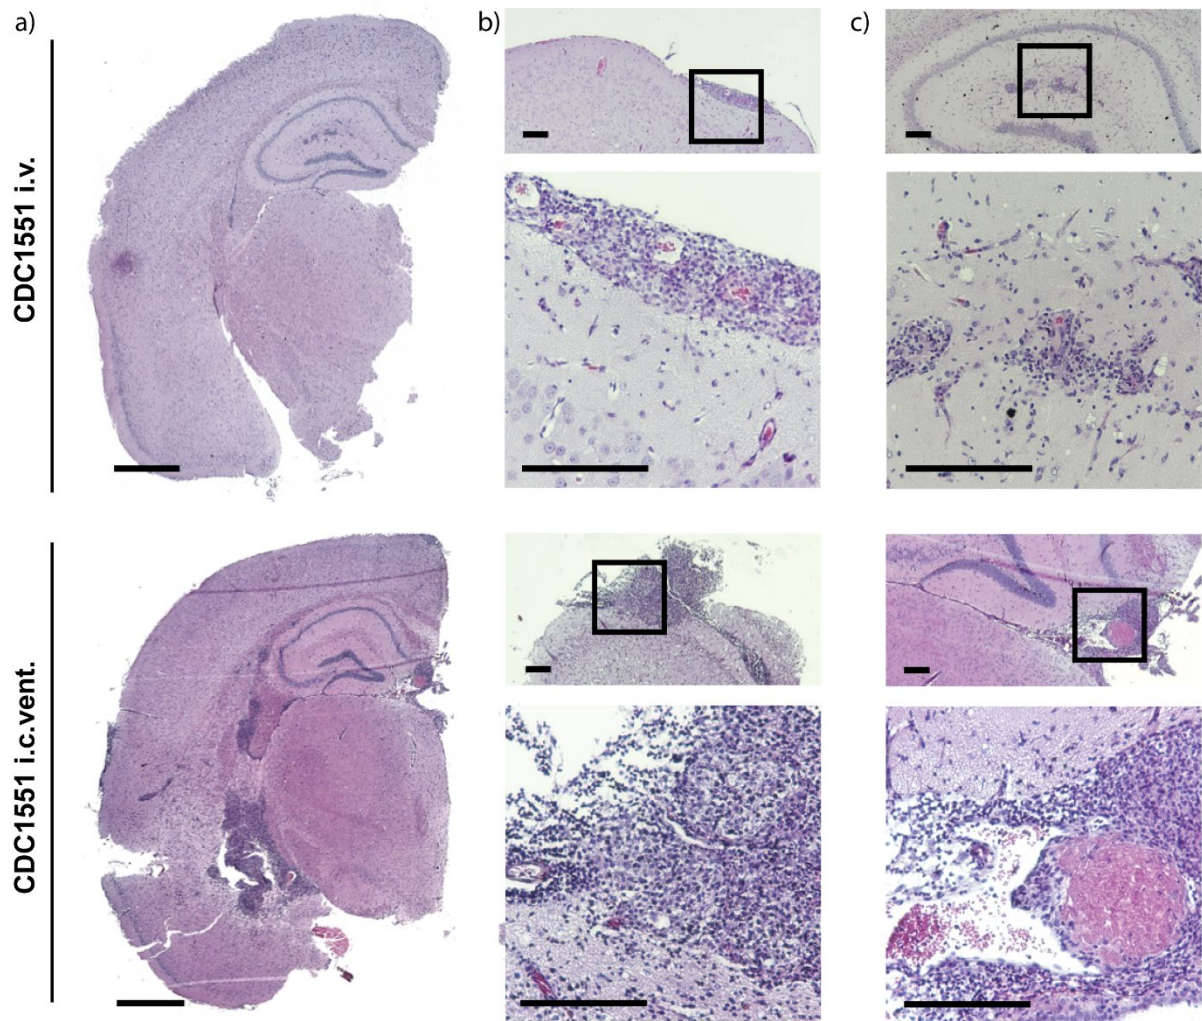

609

610 **Supplementary figure 3. *Nos2*<sup>-/-</sup> mice infected with CDC1551 by the i.c.vent. route had more**  
611 **severe meningitis and granulomas compared to i.v. route.** (a) Overall histopathology, (b) meningeal  
612 inflammation and (c) parenchymal granulomas are shown. Bottom panel: high-power views of insets.  
613 Histology is representative of 5-6 mice. (a) Scale bar = 1 mm. (b) and (c) Scale bar = 200 μm.

614



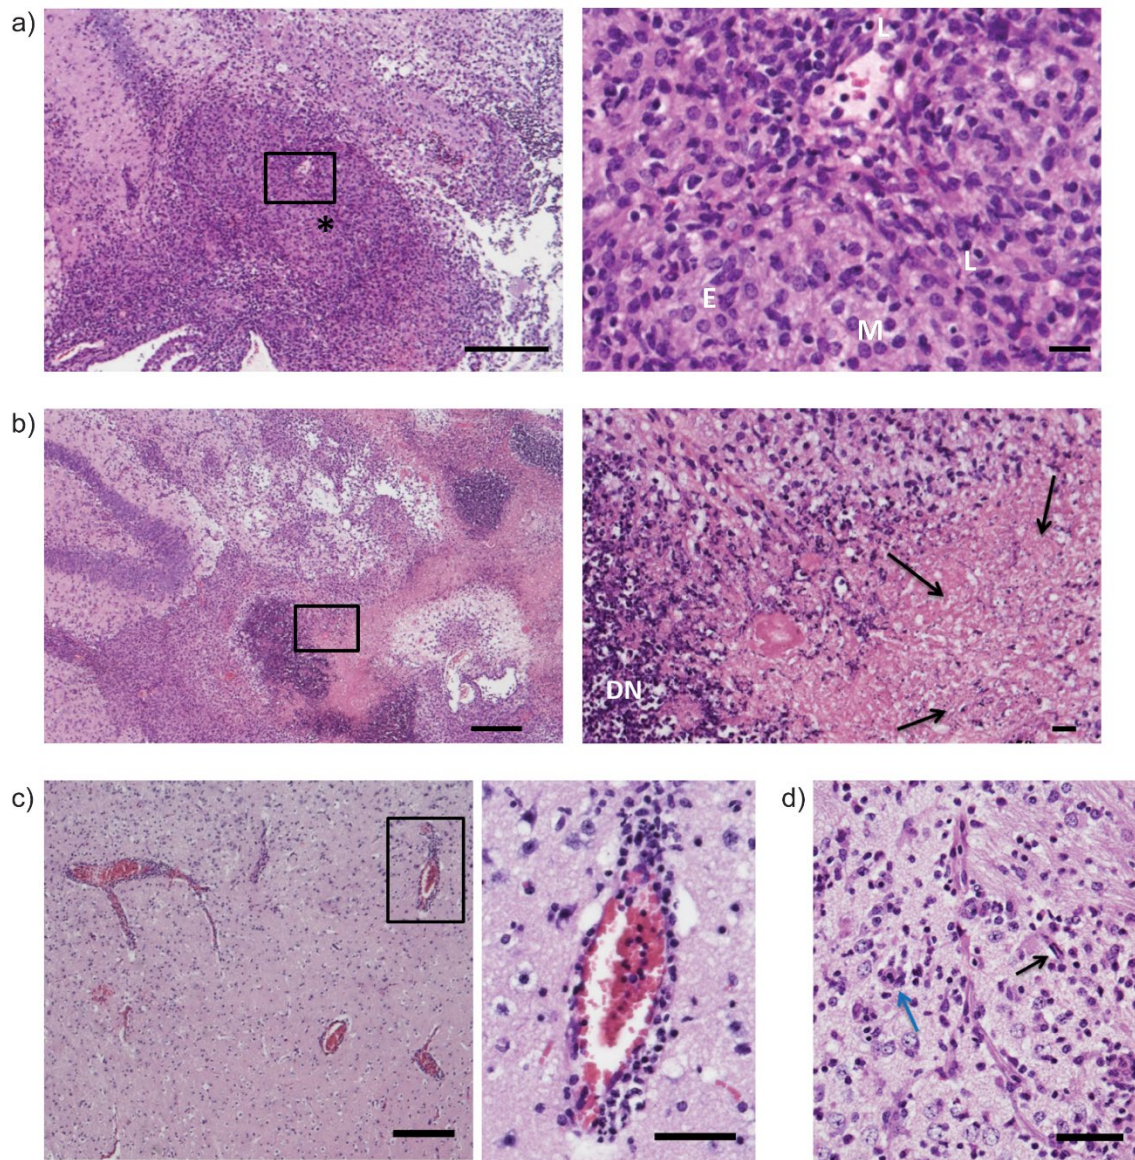

615

616 **Supplementary figure 4. Pathological lesions in the brain of H37Rv i.c.vent.-infected mice.** (a)  
617 Granuloma (\*) present in the ventricle. High-power view (inset) of the granuloma demonstrates  
618 presence of macrophages (M), epithelioid cells (E) and few lymphocytes (L). Scale bar = 200 μm (20  
619 μm in high-power view). (b) Pyogranuloma at the hippocampus showed a central area of liquefactive  
620 necrosis. High-power view (inset) of the area of liquefactive necrosis demonstrates eosinophilic cellular  
621 debris (arrow) with adjoined degenerating neutrophils (DN). Scale bar = 200 μm (50 μm in high-power  
622 view) (c) Prominent perivascular cuffing at multiple locations in the thalamus. High-power view (inset)  
623 displays inflammatory cell infiltration around a blood vessel. Scale bar = 200 μm (50 μm in high-power  
624 view) (d) Gliosis (black arrow) and neuronal necrosis present with pyknotic nucleus and eosinophilic  
625 cytoplasm (blue arrow). Scale bar = 50 μm. Histology representative of 6 mice.

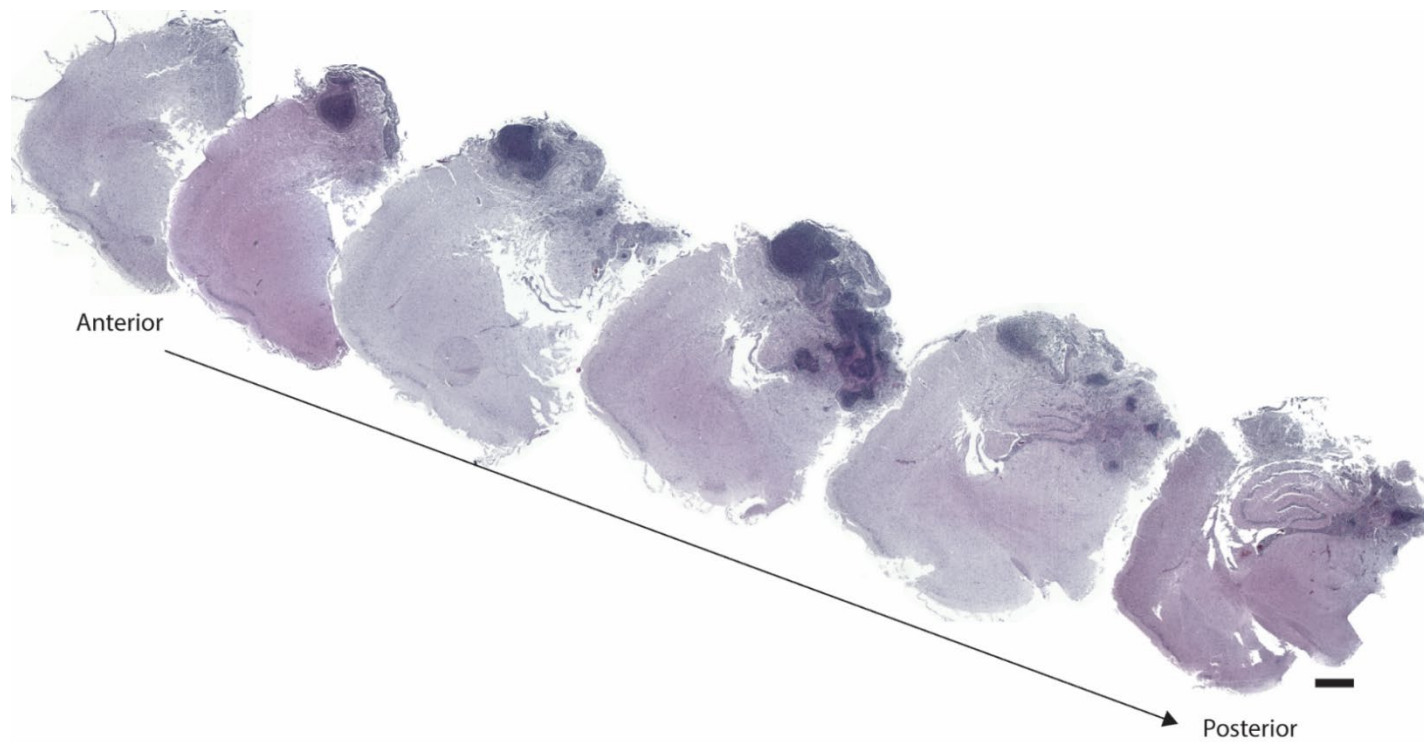

626

627 **Supplementary figure 5. Extensive meningeal and parenchymal inflammation are observed in the brain of *Nos2*<sup>-/-</sup> mice infected with H37Rv by the**  
628 **i.c.vent. route.** Serial H&E-stained histopathological sections (each 500  $\mu$ m apart) of the brain from the same animal shows the granuloma development in the  
629 anterior-posterior axis. Scale bar = 1 mm. Histology representative of 5-6 mice.

630

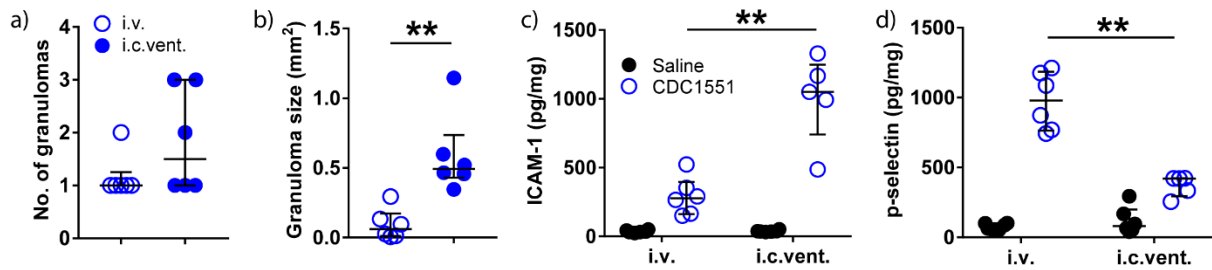

631

632 **Supplementary figure 6. CDC1551 i.c.vent. mice had larger granulomas with increased**  
633 **concentration of adhesion molecule ICAM-1 than CDC1551 i.v. mice.** (a) CDC1551-infected mice  
634 by the two routes of infection demonstrate similar number of brain granulomas. (b) CDC1551 i.c.vent.-  
635 infected mice had larger granulomas than CDC1551 i.v.-infected mice. The number and size of  
636 granulomas in each group were respectively quantified from 6 different sections of 5-6 mice. CDC1551  
637 i.c.vent.-infected mice show higher expression of (c) ICAM-1 compared to i.v.-infected mice, whereas  
638 (d) p-selectin expression was higher in i.v.-infected than i.c.vent.-infected mice. Bars represent median  
639 and IQR. Statistical analysis was conducted using Mann-Whitney test. \*\*, p < 0.01.

640

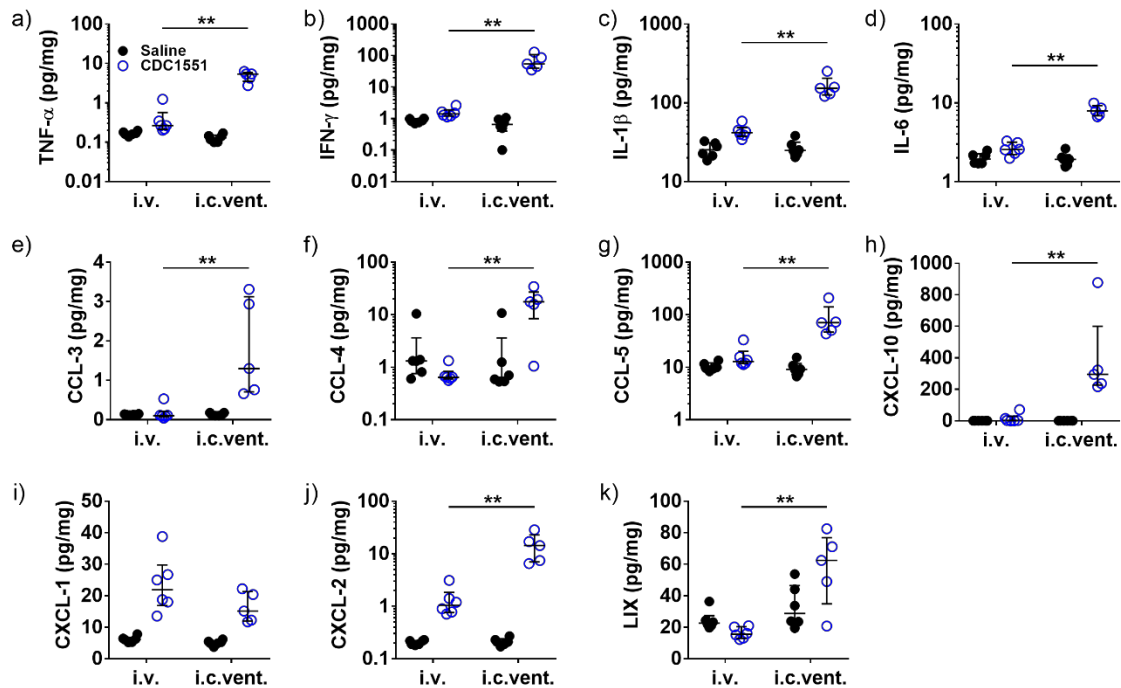

641

642 **Supplementary figure 7. CDC1551 infection by the i.c.vent. route resulted in significantly higher**

643 **brain expression of inflammatory mediators than i.v. route. CDC1551 i.c.vent.-infected mice had**

644 higher expression of (a-d) pro-inflammatory cytokines and (e-h) Th1 chemokines than CDC1551 i.v.

645 mice. Among neutrophil chemoattractants, (i) CXCL-1 expression was similar between the two

646 infection routes, while (j) CXCL-2 and (k) LIX were significantly increased in CDC1551 i.c.vent. than

647 CDC1551 i.v. mice. Inflammatory mediators in the brain were measured after day 21 p.i.. Concentration

648 of each immunological marker was normalised against the total protein concentration. Bars represent

649 median and interquartile ranges. Statistical analysis was conducted using Mann-Whitney test. \*\*, p <

650 0.01.

651



652 **ACKNOWLEDGEMENTS**

653 Catherine W. M. Ong is funded by Singapore National Medical Research Council  
654 (NMRC/TA/0042/2015, CSAINV17nov014; National University Health System  
655 (NUHS/RO/2017/092/SU/01, CFGFY18P11, NUHSRO/2020/042/RO5+5/ad-hoc/1),  
656 Singapore, iHealthtech at the National University of Singapore and recipient of the Young  
657 Investigator Award, Institut Merieux, Lyon, France. Xuan Ying Poh is supported by a  
658 postgraduate scholarship from the Yong Loo Lin School of Medicine, National University of  
659 Singapore. Jia Mei Hong was supported by NUSMed Post-Doctoral Fellowship  
660 (NUHSRO/2018/052/PDF/04). The authors would like to thank the operations team of the  
661 National University of Singapore BSL-3 core facility for the infrastructure and logistical  
662 support of the study. The authors would also like to thank National University of Singapore  
663 Comparative Medicine (CM) and the Neuroscience Phenotyping Core (NPC) for animal  
664 training and support. The authors are grateful to Professor Paul Elkington and Associate  
665 Professor Sylvie Alonso for commenting on the manuscript.

666

667 **AUTHOR CONTRIBUTIONS**

668 C.W.M.O. conceived the study. P.X.Y., H.J.M., M.Q.H. and C.W.M.O. designed the  
669 experiments. P.X.Y., H.J.M., M.Q.H., W.Y. and T.P.M. performed the experiments. P.X.Y.,  
670 R.R. and C.W.M.O. analysed the data. P.X.Y. wrote the first draft of the manuscript.

671

672 **COMPETING INTERESTS**

673 The authors declare no competing interests.

674



## 675 REFERENCES

- 676 Be, N. A., Lamichhane, G., Grosset, J., Tyagi, S., Cheng, Q. J., Kim, K. S., . . . Jain, S. K. (2008). Murine  
677 model to study the invasion and survival of Mycobacterium tuberculosis in the central nervous  
678 system. *J Infect Dis*, *198*(10), 1520-1528. doi:10.1086/592447
- 679 Bishai, W. R., Dannenberg, A. M., Jr., Parrish, N., Ruiz, R., Chen, P., Zook, B. C., . . . Pitt, M. L. (1999).  
680 Virulence of Mycobacterium tuberculosis CDC1551 and H37Rv in rabbits evaluated by Lurie's  
681 pulmonary tubercle count method. *Infect Immun*, *67*(9), 4931-4934.  
682 doi:10.1128/IAI.67.9.4931-4934.1999
- 683 Bolin, C. A., Whipple, D. L., Khanna, K. V., Risdahl, J. M., Peterson, P. K., & Molitor, T. W. (1997).  
684 Infection of swine with Mycobacterium bovis as a model of human tuberculosis. *J Infect Dis*,  
685 *176*(6), 1559-1566. doi:10.1086/514155
- 686 Brilha, S., Ong, C. W. M., Weksler, B., Romero, N., Couraud, P. O., & Friedland, J. S. (2017). Matrix  
687 metalloproteinase-9 activity and a downregulated Hedgehog pathway impair blood-brain  
688 barrier function in an in vitro model of CNS tuberculosis. *Sci Rep*, *7*(1), 16031.  
689 doi:10.1038/s41598-017-16250-3
- 690 Chan, E. D., Chan, J., & Schluger, N. W. (2001). What is the role of nitric oxide in murine and human  
691 host defense against tuberculosis? Current knowledge. *Am J Respir Cell Mol Biol*, *25*(5), 606-  
692 612. doi:10.1165/ajrcmb.25.5.4487
- 693 Chatterjee, S. (2011). Brain tuberculomas, tubercular meningitis, and post-tubercular hydrocephalus  
694 in children. *J Pediatr Neurosci*, *6*(Suppl 1), S96-S100. doi:10.4103/1817-1745.85725
- 695 Christensen, A. S., Andersen, A. B., Thomsen, V. O., Andersen, P. H., & Johansen, I. S. (2011).  
696 Tuberculous meningitis in Denmark: a review of 50 cases. *BMC Infect Dis*, *11*, 47.  
697 doi:10.1186/1471-2334-11-47
- 698 Dallenga, T., Linnemann, L., Paudyal, B., Repnik, U., Griffiths, G., & Schaible, U. E. (2018). Targeting  
699 neutrophils for host-directed therapy to treat tuberculosis. *Int J Med Microbiol*, *308*(1), 142-  
700 147. doi:10.1016/j.ijmm.2017.10.001
- 701 Donald, P. R., & Schoeman, J. F. (2004). Tuberculous meningitis. *N Engl J Med*, *351*(17), 1719-1720.  
702 doi:10.1056/NEJMp048227
- 703 Donald, P. R., & Schoeman, J. F. (2009). Central nervous system tuberculosis in children. In H. S. Schaaf,  
704 A. I. Zumla, J. M. Grange, M. C. Raviglione, W. W. Yew, & J. R. Stark (Eds.), *Tuberculosis* (pp.  
705 413-423): W. B. Saunders.
- 706 Irwin, S. M., Driver, E., Lyon, E., Schrupp, C., Ryan, G., Gonzalez-Juarrero, M., . . . Lenaerts, A. J. (2015).  
707 Presence of multiple lesion types with vastly different microenvironments in C3HeB/FeJ mice  
708 following aerosol infection with Mycobacterium tuberculosis. *Dis Model Mech*, *8*(6), 591-602.  
709 doi:10.1242/dmm.019570
- 710 Karstaedt, A. S., Valtchanova, S., Barriere, R., & Crewe-Brown, H. H. (1998). Tuberculous meningitis in  
711 South African urban adults. *QJM*, *91*(11), 743-747. doi:10.1093/qjmed/91.11.743
- 712 Kramnik, I., Dietrich, W. F., Demant, P., & Bloom, B. R. (2000). Genetic control of resistance to  
713 experimental infection with virulent Mycobacterium tuberculosis. *Proc Natl Acad Sci U S A*,  
714 *97*(15), 8560-8565. doi:10.1073/pnas.150227197
- 715 Lammie, G. A., Hewlett, R. H., Schoeman, J. F., & Donald, P. R. (2009). Tuberculous cerebrovascular  
716 disease: a review. *J Infect*, *59*(3), 156-166. doi:10.1016/j.jinf.2009.07.012
- 717 Lee, S. C., Dickson, D. W., Liu, W., & Brosnan, C. F. (1993). Induction of nitric oxide synthase activity in  
718 human astrocytes by interleukin-1 beta and interferon-gamma. *J Neuroimmunol*, *46*(1-2), 19-  
719 24. doi:10.1016/0165-5728(93)90229-r
- 720 Manca, C., Tsenova, L., Barry, C. E., 3rd, Bergtold, A., Freeman, S., Haslett, P. A., . . . Kaplan, G. (1999).  
721 Mycobacterium tuberculosis CDC1551 induces a more vigorous host response in vivo and in  
722 vitro, but is not more virulent than other clinical isolates. *J Immunol*, *162*(11), 6740-6746.
- 723 Mazzolla, R., Puliti, M., Barluzzi, R., Neglia, R., Bistoni, F., Barbolini, G., & Blasi, E. (2002). Differential  
724 microbial clearance and immunoresponse of Balb/c (Nramp1 susceptible) and DBA2 (Nramp1

- 725 resistant) mice intracerebrally infected with Mycobacterium bovis BCG (BCG). *FEMS Immunol*  
726 *Med Microbiol*, 32(2), 149-158. doi:10.1111/j.1574-695X.2002.tb00547.x
- 727 Misra, U. K., Kalita, J., Srivastava, R., Nair, P. P., Mishra, M. K., & Basu, A. (2010). A study of cytokines  
728 in tuberculous meningitis: clinical and MRI correlation. *Neurosci Lett*, 483(1), 6-10.  
729 doi:10.1016/j.neulet.2010.07.029
- 730 Nagesh Babu, G., Kumar, A., Kalita, J., & Misra, U. K. (2008). Proinflammatory cytokine levels in the  
731 serum and cerebrospinal fluid of tuberculous meningitis patients. *Neurosci Lett*, 436(1), 48-51.  
732 doi:10.1016/j.neulet.2008.02.060
- 733 Olin, M. R., Armen, A. G., Cheeran, M. C., Rock, R. B., Molitor, T. W., & Peterson, P. K. (2008). Role of  
734 nitric oxide in defense of the central nervous system against Mycobacterium tuberculosis. *J*  
735 *Infect Dis*, 198(6), 886-889. doi:10.1086/591097
- 736 Ong, C. W., Pabisiak, P. J., Brilha, S., Singh, P., Roncaroli, F., Elkington, P. T., & Friedland, J. S. (2017).  
737 Complex regulation of neutrophil-derived MMP-9 secretion in central nervous system  
738 tuberculosis. *J Neuroinflammation*, 14(1), 31. doi:10.1186/s12974-017-0801-1
- 739 Peterson, P. K., Hu, S., Anderson, W. R., & Chao, C. C. (1994). Nitric oxide production and neurotoxicity  
740 mediated by activated microglia from human versus mouse brain. *J Infect Dis*, 170(2), 457-460.  
741 doi:10.1093/infdis/170.2.457
- 742 Porkert, M. T., Sotir, M., Parrott-Moore, P., & Blumberg, H. M. (1997). Tuberculous meningitis at a  
743 large inner-city medical center. *Am J Med Sci*, 313(6), 325-331. doi:10.1097/00000441-  
744 199706000-00002
- 745 Rock, R. B., Hu, S., Deshpande, A., Munir, S., May, B. J., Baker, C. A., . . . Kapur, V. (2005). Transcriptional  
746 response of human microglial cells to interferon-gamma. *Genes Immun*, 6(8), 712-719.  
747 doi:10.1038/sj.gene.6364246
- 748 Rock, R. B., Olin, M., Baker, C. A., Molitor, T. W., & Peterson, P. K. (2008). Central nervous system  
749 tuberculosis: pathogenesis and clinical aspects. *Clin Microbiol Rev*, 21(2), 243-261, table of  
750 contents. doi:10.1128/CMR.00042-07
- 751 Rom, W. N., Garay SM. (2004). *Tuberculosis* (2 ed.). Philadelphia: Lippincott Williams & Wilkins.
- 752 Saez-Llorens, X., Ramilo, O., Mustafa, M. M., Mertsola, J., & McCracken, G. H., Jr. (1990). Molecular  
753 pathophysiology of bacterial meningitis: current concepts and therapeutic implications. *J*  
754 *Pediatr*, 116(5), 671-684. doi:10.1016/s0022-3476(05)82647-2
- 755 Sanchez-Garibay, C., Hernandez-Campos, M. E., Tena-Suck, M. L., & Salinas-Lara, C. (2018).  
756 Experimental animal models of central nervous system tuberculosis: A historical review.  
757 *Tuberculosis (Edinb)*, 110, 1-6. doi:10.1016/j.tube.2018.02.007
- 758 Schaller, M. A., Wicke, F., Foerch, C., & Weidauer, S. (2019). Central Nervous System Tuberculosis :  
759 Etiology, Clinical Manifestations and Neuroradiological Features. *Clin Neuroradiol*, 29(1), 3-18.  
760 doi:10.1007/s00062-018-0726-9
- 761 Schneemann, M., & Schoeden, G. (2007). Macrophage biology and immunology: man is not a mouse.  
762 *J Leukoc Biol*, 81(3), 579; discussion 580. doi:10.1189/jlb.1106702
- 763 Sharma, S., Goyal, M. K., Sharma, K., Modi, M., Sharma, M., Khandelwal, N., . . . Lal, V. (2017). Cytokines  
764 do play a role in pathogenesis of tuberculous meningitis: A prospective study from a tertiary  
765 care center in India. *J Neurol Sci*, 379, 131-136. doi:10.1016/j.jns.2017.06.001
- 766 Shaw, J. E. T., Pasipanodya, J. G., & Gumbo, T. (2010). Meningeal tuberculosis: high long-term mortality  
767 despite standard therapy. *Medicine (Baltimore)*, 89(3), 189-195.  
768 doi:10.1097/MD.0b013e3181df9070
- 769 Shope, R. E., & Lewis, P. A. (1929). A Paralytic Disease of Guinea Pigs Due to the Tubercle Bacillus. *J*  
770 *Exp Med*, 50(3), 365-370. doi:10.1084/jem.50.3.365
- 771 Swaim, L. E., Connolly, L. E., Volkman, H. E., Humbert, O., Born, D. E., & Ramakrishnan, L. (2006).  
772 Mycobacterium marinum infection of adult zebrafish causes caseating granulomatous  
773 tuberculosis and is moderated by adaptive immunity. *Infect Immun*, 74(11), 6108-6117.  
774 doi:10.1128/IAI.00887-06

- 775 The Lancet, N. (2011). Tuberculosis of the CNS remains a lethal threat. *Lancet Neurol*, 10(5), 395.  
776 doi:10.1016/S1474-4422(11)70082-5
- 777 Tsenova, L., Mangaliso, B., Muller, G., Chen, Y., Freedman, V. H., Stirling, D., & Kaplan, G. (2002). Use  
778 of IMiD3, a thalidomide analog, as an adjunct to therapy for experimental tuberculous  
779 meningitis. *Antimicrob Agents Chemother*, 46(6), 1887-1895. doi:10.1128/aac.46.6.1887-  
780 1895.2002
- 781 Tsenova, L., Sokol, K., Freedman, V. H., & Kaplan, G. (1998). A combination of thalidomide plus  
782 antibiotics protects rabbits from mycobacterial meningitis-associated death. *J Infect Dis*,  
783 177(6), 1563-1572. doi:10.1086/515327
- 784 Tucker, E. W., Pokkali, S., Zhang, Z., DeMarco, V. P., Klunk, M., Smith, E. S., . . . Kannan, S. (2016).  
785 Microglia activation in a pediatric rabbit model of tuberculous meningitis. *Dis Model Mech*,  
786 9(12), 1497-1506. doi:10.1242/dmm.027326
- 787 van Well, G. T., Wieland, C. W., Florquin, S., Roord, J. J., van der Poll, T., & van Furth, A. M. (2007). A  
788 new murine model to study the pathogenesis of tuberculous meningitis. *J Infect Dis*, 195(5),  
789 694-697. doi:10.1086/511273
- 790 Wilkinson, R. J., Rohlwick, U., Misra, U. K., van Crevel, R., Mai, N. T. H., Dooley, K. E., . . . Tuberculous  
791 Meningitis International Research, C. (2017). Tuberculous meningitis. *Nat Rev Neurol*, 13(10),  
792 581-598. doi:10.1038/nrneurol.2017.120
- 793 Zaharie, S. D., Franken, D. J., van der Kuip, M., van Elsland, S., de Bakker, B. S., Hagoort, J., . . . Marceline  
794 van Furth, A. (2020). The immunological architecture of granulomatous inflammation in  
795 central nervous system tuberculosis. *Tuberculosis (Edinb)*, 125, 102016.  
796 doi:10.1016/j.tube.2020.102016
- 797 Zucchi, F. C., Pelegrini-da-Silva, A., Neder, L., Silva, C. L., Tsanaclis, A. M., & Takayanagui, O. M. (2012).  
798 The contribution of a murine CNS-TB model for the understanding of the host-pathogen  
799 interactions in the formation of granulomas. *J Neurosci Methods*, 206(1), 88-93.  
800 doi:10.1016/j.jneumeth.2012.02.015
- 801
