1 **Title:**

2 ***Nos2*<sup>-/-</sup> mice infected with *M. tuberculosis* develop neurobehavioral changes and**  
3 **immunopathology mimicking human central nervous system tuberculosis**

4

5 **Authors:**

6 Xuan Ying Poh<sup>1</sup>, Jia Mei Hong<sup>1</sup>, Chen Bai<sup>1</sup>, Qing Hao Miow<sup>1</sup>, Pei Min Thong<sup>1</sup>, Yu Wang<sup>1</sup>,  
7 Ravisankar Rajarethinam<sup>2</sup>, Cristine S.L. Ding<sup>3</sup>, Catherine W.M. Ong<sup>1,4,5\*</sup>

8

9 **Affiliations:**

10 <sup>1</sup>Infectious Diseases Translational Research Programme, Department of Medicine, Yong Loo  
11 Lin School of Medicine, National University of Singapore, Singapore

12 <sup>2</sup>Advanced Molecular Pathology Laboratory, Institute of Molecular and Cell Biology,  
13 Agency for Science, Technology and Research (A\*STAR), Singapore

14 <sup>3</sup>Department of Pathology, Tan Tock Seng Hospital, Singapore

15 <sup>4</sup>Division of Infectious Diseases, Department of Medicine, National University Hospital,  
16 Singapore

17 <sup>5</sup>Institute for Health Innovation and Technology (iHealthtech), National University of  
18 Singapore, Singapore

19

20 \* **Corresponding author**

21 Catherine Wei Min Ong

22 10<sup>th</sup> floor, Tower Block,

23 1E Kent Ridge Road

24 Singapore 119228

25 Email: [Catherine\\_wm\\_ong@nuhs.edu.sg](mailto:Catherine_wm_ong@nuhs.edu.sg)

26

27 **Keywords:** CNS-TB, mouse model, H37Rv, Intra-cerebroventricular, pyogranulomas.

28

29 **Abstract word count (limit): 247 (350)**

30 **Word count: 5370**

31 **Page numbers: 41**

32 **Figures: 5**

33 **Tables: 2**

34 **Video 1.** Saline control *Nos2*<sup>-/-</sup> mice

35 **Video 2.** *Nos2*<sup>-/-</sup> mice infected with *M.tb* via the i.c.vent. route exhibited myoclonic jerks and

36 limb weakness.

37 **Supplementary Tables: 1**

38 **Supplementary Figures: 7**

39

40 **ABSTRACT (350 words max)**

41 **Background:**

42 Understanding the pathophysiology of central nervous system tuberculosis (CNS-TB) is  
43 hampered by the lack of a good pre-clinical model that mirrors the human CNS-TB infection.  
44 We developed a murine CNS-TB model that demonstrates neurobehavioral changes with  
45 similar immunopathology with human CNS-TB.

46 **Methods:**

47 We injected two *Mycobacterium tuberculosis* (*M.tb*) strains, H37Rv and CDC1551,  
48 respectively, into two mouse strains, C3HeB/FeJ and *Nos2*<sup>-/-</sup> mice, either into the third  
49 ventricle or intravenous. We compared the neurological symptoms, histopathological changes  
50 and levels of adhesion molecules, chemokines, and inflammatory cytokines in the brain  
51 induced by the infections through different routes in different strains.

52 **Results:**

53 Intra-cerebroventricular infection of *Nos2*<sup>-/-</sup> mice with *M.tb* led to development of  
54 neurological signs and more severe brain granulomas compared to C3HeB/FeJ mice.  
55 Compared with CDC1551 *M.tb*, H37Rv *M.tb* infection resulted in a higher neurobehavioral  
56 score and earlier mortality. Intra-cerebroventricular infection caused necrotic neutrophil-  
57 dominated pyogranulomas in the brain relative to intravenous infection which resulted in  
58 disseminated granulomas and mycobacteraemia. Histologically, intra-cerebroventricular  
59 infection of *Nos2*<sup>-/-</sup> mice with *M.tb* resembled human CNS-TB brain biopsy specimens.  
60 H37Rv intra-cerebroventricular infected mice demonstrated higher brain concentrations of  
61 inflammatory cytokines, chemokines and adhesion molecule ICAM-1 than H37Rv  
62 intravenous-infected mice.

63 **Conclusions:**

64 Intra-cerebroventricular infection of *Nos2*<sup>-/-</sup> mice with H37Rv creates a murine CNS-TB  
65 model that resembled human CNS-TB immunopathology, exhibiting the worst  
66 neurobehavioral score with a high and early mortality reflecting disease severity and its  
67 associated neurological morbidity. Our murine CNS-TB model serves as a pre-clinical  
68 platform to dissect host-pathogen interactions and evaluate therapeutic agents for CNS-TB.

## 69 BACKGROUND

70 The most severe form of *Mycobacterium tuberculosis* (*M.tb*) infection is central  
71 nervous system tuberculosis (CNS-TB) which has high mortality and serious long-term  
72 neurological sequelae even with effective anti-tuberculous treatment [1-3]. Common  
73 manifestations of human CNS-TB are tuberculous meningitis (TBM), tuberculomas and  
74 tuberculous brain abscesses [4]. Cerebral vasculitis and inflammation resulting in infarcts is  
75 the primary cause of permanent brain tissue damage in TBM and is among the worst  
76 consequences of CNS-TB [5, 6]. Despite effective TB treatment with antibiotics and  
77 adjunctive corticosteroids, CNS-TB remains one of the more challenging clinical syndromes  
78 to manage.

79

80 To advance our understanding of CNS-TB, we need an appropriate animal model that  
81 recapitulates the neurobehavioral, immunopathological and histopathological changes in  
82 human CNS-TB to dissect pathogenesis and aid drug discovery. Several animal models of  
83 CNS-TB have been described, including guinea pigs, rabbits, mice, pigs, and zebrafish. The  
84 rabbit model closely mimics human disease, developing clinical and histological changes [7-  
85 13]. However, a number of immunological tools profiling protein secretion and gene  
86 expression are unavailable for rabbits [1] and therefore preclude their suitability for in-depth  
87 immunological studies.

88

89 The mouse model has many advantages over other animals, including the availability  
90 of genetic and molecular tools as well as cost-effectiveness for large studies. However,  
91 existing murine CNS-TB models do not display the clinical features and immunological  
92 phenotypes of CNS-TB observed in humans. C57BL/6 mice are generally resistant to CNS-

93 TB infection, with no pathological abnormalities detected and no observed mortality over 24  
94 weeks of study [14]. BALB/c mice infected through the intracerebral route directly into the  
95 brain parenchyma with *Mycobacterium bovis* BCG (BCG) had infiltration of inflammatory  
96 cells, but no granulomas were observed [10]. This contrasts with human CNS-TB where  
97 tuberculomas occur in approximately 30% of TBM patients [15]. Intravenous inoculation of  
98 BALB/c mice with *M.tb* strain CDC1551 successfully infected the CNS but did not produce  
99 granulomas in the brain and had low expression of brain chemokines and cytokines IL-1 $\beta$ ,  
100 IL-6, TNF- $\alpha$  and IFN- $\gamma$ , in contrast to the increased expression of these cytokines in the  
101 cerebrospinal fluid (CSF) of human TBM patients [16, 17]. While some murine CNS-TB  
102 models have meningitis and/or brain granulomas, they do not demonstrate neurological signs  
103 of disease and mortality, unlike human CNS-TB [14, 18]. Given the varying susceptibility  
104 and pathology of CNS-TB infection in different mouse strains, genetic predisposition is likely  
105 to play a crucial role. C3HeB/FeJ “Kramnik” mice were found to be hyper susceptible to  
106 *M.tb* infection due to the presence of an allele, termed the “super susceptibility to tuberculosis  
107 1” (*sst1*) locus, and developed a more human-like lung pathology in contrast to C57BL/6  
108 mice [19, 20]. However, the ability of C3HeB/FeJ mice to develop CNS-TB remains to be  
109 explored.

110

111 Intracerebral-infection with *M.tb* H37Rv directly into the brain parenchyma of  
112 inducible nitric oxide synthase (iNOS)-knockout mice resulted in neurological signs with  
113 meningitis, and mice exhibited 63% mortality post-infection (p.i.) [21]. However, the  
114 development of intracerebral tuberculomas and immunological profile were not phenotyped  
115 in this mouse model. Cytokine-induced upregulation of iNOS or NOS2 by murine  
116 macrophages have been implicated in the killing of intracellular pathogens such as *M.tb*, but  
117 the role of this antimicrobial system in human macrophages remains unclear [22, 23]. Studies

118 have shown that activated human microglia, the brain resident macrophages, do not express  
119 iNOS [24, 25] or reactive nitrogen intermediate (RNI) nitric oxide (NO) [26], whereas  
120 murine microglia produced substantial amounts of NO on activation [26]. Given the well-  
121 established role of macrophages in TB, the inter-species difference in microglia expression of  
122 iNOS may explain the species tropism barrier to the development of CNS-TB in mice.

123

124 To address the limitations of existing murine CNS-TB models, we explored the  
125 effects of mouse strains, *M.tb* strains and routes of infection on the development of CNS-TB  
126 disease. First, we compared two mouse strains, C3HeB/FeJ and *Nos2*<sup>-/-</sup> mice, to investigate  
127 whether the *sst1* locus or *Nos2* gene plays a more important role in CNS-TB infection. After  
128 selecting the suitable mouse strain, we investigated the effects of two different *M.tb* strains,  
129 H37Rv and CDC1551, and two routes of infection: intra-cerebroventricular (i.c.vent.) into the  
130 third ventricle and intravenous (i.v.), on the development of a murine CNS-TB model with  
131 human-like pathology. The i.c.vent. route of infection mimics the rupture of meningeal  
132 tuberculous lesions and the subsequent release of *M.tb* into the CSF, whereas the i.v. route  
133 mimics the hematogenous spread of *M.tb*. In this study, we showed that i.c.vent. infection of  
134 *Nos2*<sup>-/-</sup> mice with *M.tb* H37Rv developed the severe neurological symptoms and induced a  
135 high expression of adhesion molecules, chemokines, and inflammatory cytokines in the brain,  
136 consistent with the infiltration of inflammatory cells and pathological changes. This pre-  
137 clinical model can be used to understand the mechanisms in host immunopathology and  
138 evaluate treatment for CNS-TB.

139

## 140 **METHODS**

### 141 **Human CNS-TB brain specimen processing**

142           The paraffin blocks of three surgical samples from patients with histological features  
143 indicative of CNS-TB infection were retrieved from the files of the Department of Pathology  
144 at Tan Tock Seng Hospital, Singapore. The specimens included leptomeninges and brain  
145 parenchyma, and demonstrated granulomatous inflammation typical of CNS-TB. Acid-fast  
146 bacilli were demonstrated on Ziehl-Neelsen histochemical stain in two out of three samples.  
147 Control brain sections were from the non-neoplastic brain parenchyma of three surgical  
148 pathology brain resection specimens. 4 µm thick sections were cut from each block for H&E  
149 staining according to the manufacturer's instructions.

150

### 151 **Bacterial strains and growth conditions for infection**

152           *Mycobacterium tuberculosis* (*M.tb*) strains H37Rv and CDC1551 were kindly  
153 provided by Professor Nick Paton and Associate Professor Sylvie Alonso (both NUS,  
154 Singapore) respectively. For infection experiments, a frozen vial of *M.tb* was thawed and  
155 cultured to mid-logarithmic phase at an optical density of 0.6-0.8. Prior to infection, the *M.tb*  
156 was centrifuged at 3,200 x g for 10 minutes and resuspended in 1 mL sterile 0.9% NaCl. The  
157 *M.tb* inoculum was then plated to determine the dose of infection.

158

### 159 **Mouse cannula implantation and infection**

160           Six- to eight-week-old male C57BL/6 *Nos2*<sup>-/-</sup> (Stock No. 002609) and C3HeB/FeJ  
161 (Stock No. 000658) mice (Jackson Laboratory, Bar Harbor, Maine) were used for intra-  
162 cerebroventricular (i.c.vent.) or intravenous (i.v.) infection. Mice in the i.c.vent. group were  
163 cannulated one week before infection. An illustration of the stereotaxic coordinates of site of  
164 injection and the positioning of guide cannula is shown in Supplementary Figure 1a. A



165 motorized stereotaxic instrument (Neurostar, Tübingen, Germany) was used to implant a 26-  
166 gauge guide cannula (RWD, Shenzhen, China) into the third ventricle (coordinates from the  
167 bregma: -1.6 mm posterior, 0 mm lateral, -2.5 mm ventral). The same coordinates were used  
168 for both C57BL/6 *Nos2*<sup>-/-</sup> and C3HeB/FeJ Kramnik mice as the size of mice were similar at  
169 the time of cannulation. *Nos2*<sup>-/-</sup> mice were 23.5 g ( $\pm$  1.1) (mean  $\pm$  s.d.) and C3HeB/FeJ  
170 Kramnik mice were 24.7g ( $\pm$ 1.6) (p = NS). Mice were injected with 0.5  $\mu$ L of sterile 0.9%  
171 NaCl or  $2 \times 10^8$  CFU/mL *M.tb* through the brain cannula (over 5 min) using the syringe  
172 pump (Harvard Apparatus, Holliston, Massachusetts). Mice in the i.v. group were injected  
173 with 50  $\mu$ L of sterile 0.9% NaCl or  $2 \times 10^6$  CFU/mL *M.tb* via the retro-orbital sinus. *M.tb*  
174 was administered at a dose of  $10^5$  CFU to each animal, irrespective of the route of infection.  
175 This dose was chosen as previous CNS-TB murine models have administered *M.tb* within the  
176 range of  $10^5$  to  $10^6$  CFU [14, 16, 21, 27]. However, different infection routes have different  
177 recommended administration volumes (0.5  $\mu$ L for i.c.vent. and 50  $\mu$ L for i.v.) and the  
178 concentration of *M.tb* for i.c.vent. route was 100-fold more concentrated than the i.v. route.  
179 All mice were observed for mortality and weight change. Humane endpoints included  $\geq$  20%  
180 weight loss, complete hind limb paralysis and repeated seizures. Infected mice were also  
181 monitored daily for 56 days after infection for clinical signs indicative of CNS-TB, such as  
182 limb weakness, tremors, and twitches.

183

184 30  $\mu$ L of trypan blue was administered into four cannulated *Nos2*<sup>-/-</sup> mice and the  
185 brains harvested 15 mins post-administration to allow for distribution of the dye in both right  
186 and left cerebral hemispheres. A sagittal illustration of the ventricular system in the mouse  
187 brain, which include the lateral ventricles, third ventricle and aqueduct that leads to the fourth  
188 ventricle, is depicted in Supplementary Figure 1b. Coronal sections of each brain verifies that  
189 the dye is in the ventricular system (Supplementary figure 1c), indicating successful brain

190 cannulation into the third ventricle. Given the similar sizes of both strains of mice at  
191 cannulation, trypan blue was not instilled into the ventricles of the C3HeB/FeJ Kramnik mice,  
192 but H&E staining of i.c.vent.-infected Kramnik mice showed more marked meningeal  
193 inflammation than the brain parenchyma (Supplementary Figure 1e), indicating the accurate  
194 placement of the cannula into the cerebral ventricles. *Nos2*<sup>-/-</sup> or C3HeB/FeJ mice were  
195 infected with *M.tb* 7 days after brain cannulation, and the blood, brain, lungs, liver and spleen  
196 were harvested 56 days post-infection (p.i.) for enumeration of mycobacterial load,  
197 histopathological analysis and immunological marker analysis (Supplementary figure 1d).

198

### 199 **Neurobehavioral scoring**

200 Neurobehavioral scoring was performed by a researcher (P.X.Y.) blinded to the route  
201 of infection and strain of *M.tb* according to a scoring list for CNS-TB mouse model (Table 2),  
202 adapted from Tucker et al [12]. Each scoring parameter ranged from one, corresponding to no  
203 abnormalities, to a variable maximum score. The minimum total score is 3 indicating a  
204 normal mouse. Higher neurological scores reflect an increasing severity of neurological  
205 deficits with a maximum total score of 7.

206

### 207 **Organ harvesting and processing**

208 Eight weeks post-infection, mice were deeply anesthetized before cardiac puncture  
209 was performed for blood collection. The brain, lungs, liver and spleen were harvested and the  
210 gross pathology examined before tissue processing. Half of each organ was fixed in 10%  
211 neutral buffered formalin for histology, while the other half was homogenized for bacterial  
212 enumeration and characterization of immunological markers. Organs were homogenized by

213 high-speed shaking in 2 mL microcentrifuge tubes filled with sterile PBS and 5/7 mm  
214 stainless steel beads using TissueLyser LT (Qiagen, Hilden, Germany).

215

216

### 217 **Histopathological analysis**

218 Histopathology was performed on the left hemisphere of the murine brain. The  
219 murine brain was fixed in 10% neutral buffered formalin, paraffin embedded and sectioned to  
220 4 µm thickness. Brain slices were stained with hematoxylin-eosin (H&E) (Vector  
221 Laboratories, Burlingame, California) to characterise pathological lesions and Ziehl-Neelsen  
222 staining (Sigma-Aldrich, St. Louis, Missouri) to detect mycobacterium according to  
223 manufacturer's instructions. Histopathological examination was carried out in a blinded  
224 fashion by a histopathologist (R.R.) based on the presence of pathological changes including  
225 inflammation, perivascular cuffing, gliosis, neuronal necrosis, granuloma, pyogranuloma and  
226 necrosis. Definition of granulomatous lesions in this study includes both granulomas and  
227 pyogranulomas. Grading of severity was assigned on the following scale: 0: no abnormalities  
228 detected; 1-minimal; 2-mild; 3-moderate; 4-marked & 5-severe. The total number and area of  
229 granulomatous lesions were measured from 6 different sections of 5-6 mice. To quantify the  
230 area of granuloma, we utilized the free-hand tool in ImageJ (NIH, Bethesda, Maryland) and  
231 manually demarcated the granuloma as a region of interest for area measurement.

232

### 233 **Immunological marker analysis**

234 Adhesion molecules, cytokines and chemokines were analysed by Fluorokine  
235 multianalyte profiling kit according to the manufacturer's protocol (R&D Systems,  
236 Minneapolis, Minnesota) on the Bio-Plex 200 platform (Bio-Rad, Hercules, California). The

237 minimum detection limit for the ICAM-1 and p-selectin were 52.7 pg/ml and 2.6 pg/ml  
238 respectively. The minimum detection limit for the cytokines and chemokines were CCL-  
239 2/MCP-1 134 pg/ml, CCL-3/MIP-1 $\alpha$  0.452 pg/ml, CCL-4/ MIP-1 $\beta$  77.4 pg/ml, CCL-5/  
240 RANTES 19.1 pg/ml, CCL-7/ MCP-3 1.69 pg/ml, CCL-8/ MCP-2 0.283 pg/ml, CCL-  
241 11/Eotaxin 1.46 pg/m, CCL-12/ MCP-5 0.613 pg/ml, CCL-19/ MIP-3 $\beta$  2.28 pg/ml, CCL-20/  
242 MIP-3 $\alpha$  3.95 pg/ml, CCL-22/ MDC 0.965 pg/ml, CXCL-1/ KC 32.9 pg/ml, CXCL-2/ MIP-2  
243 1.97 pg/ml, CXCL-10/ IP-10 6.85 pg/ml, CXCL-13/ BLC 19.3 pg/ml, IL-1 $\alpha$  8.17 pg/ml, IL-  
244 1 $\beta$  41.8 pg/ml, IL-6 2.30 pg/ml, IL-12 p70 12.8 pg/ml, IL-17A 7.08 pg/ml, IL-27 1.84  
245 pg/ml, LIX 2.02 pg/ml, TNF- $\alpha$  1.47 pg/ml, IFN- $\gamma$  1.85 pg/ml. Brain homogenates were  
246 assayed at neat for all analytes and results were normalised to their total protein  
247 concentrations (Bio-Rad, Hercules, California).

248

## 249 **Statistics**

250 Continuous variables are presented as medians and interquartile range. Neurobehavior  
251 scores and body weight change between groups were compared using two-way ANOVA with  
252 post-hoc Tukey's multiple comparisons test. Levels of adhesion molecules, cytokines and  
253 chemokines, and CFU counts between groups were compared using Mann-Whitney test.  
254 Comparison of survival curves between groups was calculated using the log-rank test. A two-  
255 sided value of  $p < 0.05$  was considered significant. All analyses were performed using  
256 GraphPad Prism version 7.05 (Graphpad, San Diego, California).

257

258 **RESULTS**

259 ***M.tb* infected *Nos2*<sup>-/-</sup> strain exhibited worse neurobehavioral score and worse**  
260 **histopathological changes in the brain than C3HeB/FeJ strain**

261 To investigate whether *Nos2*<sup>-/-</sup> or C3HeB/FeJ mice better replicate human CNS-TB ,  
262 we inoculated each mouse with  $9.15 \pm 2.33 \times 10^4$  colony forming units (CFU; mean  $\pm$  s.d) of  
263 *M.tb* CDC1551 into the third ventricle to infect the meninges (Supplementary figure 1).  
264 Infected *Nos2*<sup>-/-</sup> mice displayed neurological symptoms such as twitching and limb weakness  
265 from 3 weeks post-infection (p.i.) (Video 2) that were not observed in infected C3HeB/FeJ  
266 mice or saline control mice (Video 1). Infected *Nos2*<sup>-/-</sup> mice had significantly higher  
267 neurobehavioral scores than infected C3HeB/FeJ mice at 4 and 8 weeks p.i. (Figure 1a,  $p <$   
268  $0.0001$  and  $p < 0.0001$  respectively). Neurological behavior assessed include tremors,  
269 twitches and appearance of eyes, with higher neurobehavioral scores reflecting an increasing  
270 severity of neurological deficits. CFU enumeration showed that brain and lung homogenates  
271 of infected *Nos2*<sup>-/-</sup> mice had higher mycobacterial load compared to infected C3HeB/FeJ mice  
272 that had a trend to statistical significance (Figure 1b). Median (IQR) brain CFU count in  
273 *Nos2*<sup>-/-</sup> and C3HeB/FeJ mice was  $5 \times 10^5$  ( $1.65 \times 10^5 - 5.8 \times 10^5$ ) compared to  $9.75 \times 10^2$   
274 ( $6.25 \times 10^1 - 5 \times 10^3$ ) respectively ( $p = 0.057$ ), while median (IQR) lung CFU count was  $1.00$   
275  $\times 10^3$  ( $6.5 \times 10^2 - 1.5 \times 10^3$ ) in infected *Nos2*<sup>-/-</sup> mice and  $0$  ( $0 - 75$ ) in infected C3HeB/FeJ  
276 mice ( $p = 0.057$ ). Mycobacterial load in the liver, spleen and blood were similar.

277

278 Although there were no macroscopic changes in the brain, lung and spleen between  
279 the two mouse strains (Figure 1c), histopathological analysis revealed considerable  
280 differences between these two strains (Figure 1d). Infected *Nos2*<sup>-/-</sup> mice demonstrated more  
281 inflammatory cell infiltrate in the brain parenchyma compared to infected C3HeB/FeJ mice.

282 We postulated that the increase in leukocyte inflammation might be due to increased  
283 expression of adhesion molecules in the brain, and confirmed a significantly higher  
284 concentration of ICAM-1 and p-selectin in infected *Nos2*<sup>-/-</sup> than C3HeB/FeJ mice (Figure 1e  
285 and f). Brain concentration of ICAM-1 and p-selectin were 14-fold (p = 0.0089) and 10-fold  
286 (p = 0.0008) higher in infected *Nos2*<sup>-/-</sup> compared to C3HeB/FeJ mice.

287

288 Next, we investigated further the mechanism behind the increased immune cell  
289 recruitment in infected *Nos2*<sup>-/-</sup> mice. As TB is characterised by a Th1 inflammatory  
290 response, we examined the concentrations of Th1 cytokines and chemokines. Concentrations  
291 of neutrophil chemoattractants were also profiled as histopathological analysis showed  
292 marked neutrophilic inflammation. Concentrations of Th1-associated inflammatory mediators  
293 TNF- $\alpha$  and CXCL-10 were significantly higher in infected *Nos2*<sup>-/-</sup> mice than infected  
294 C3HeB/FeJ mice, while IFN- $\gamma$  and CCL-5 showed a trend to increase (Figure 2a, b, c and d).  
295 Infected *Nos2*<sup>-/-</sup> mice also had a significantly higher concentration of chemoattractants,  
296 CXCL-1, CXCL-2 and LIX, than infected C3HeB/FeJ mice (Figure 2e, f and g), which may  
297 explain the neutrophilic infiltration in the brain and meninges of *Nos2*<sup>-/-</sup> *M.tb*-infected mice  
298 relative to the C3HeB/FeJ *M.tb*-infected mice. As *Nos2*<sup>-/-</sup> mice displayed a greater severity of  
299 CNS-TB disease than C3HeB/FeJ mice in terms of neurobehavior, histopathology, and  
300 immunological profile, the *Nos2*<sup>-/-</sup> mouse strain was chosen for all subsequent experiments.

301 **I.c.vent. infection by H37Rv *M.tb* strain resulted in a worse neurobehavioral score,**  
302 **earlier mortality and increased mycobacterial load in the brain than CDC1551 *M.tb***  
303 **strain**

304 We further compared two different *M.tb* strains, H37Rv and CDC1551, on the  
305 neurobehavioral scores and mortality outcomes. At day 28 p.i., infected mice had a  
306 significantly lower weight than saline control, independent of the routes of infection (Figure  
307 3a and Supplementary figure 2a). Within the i.c.vent. group, weight change between H37Rv-  
308 and CDC1551-infected mice were similar throughout the study (Figure 3a). However, within  
309 the i.v. group, the weight change in H37Rv-infected mice at day 28 p.i. was  $-3.6 \pm 3.1\%$   
310 (mean  $\pm$  s.d.) which was significantly different from CDC1551-infected mice that gained a  
311 mean weight of  $6.0 \pm 2.4\%$  ( $p = 0.0027$ ) (Supplementary figure 2a).

312

313 By day 28 p.i., 3 out of 6 (50%) H37Rv i.c.vent.-infected mice were euthanized as  
314 they reached the humane end point, compared to 1 out of 5 (20%) in CDC1551-infected mice  
315 (Figure 3b). As infection progressed, neurological signs in surviving H37Rv i.c.vent. mice  
316 worsened with a higher neurobehavioral score than CDC1551 i.c.vent. mice by week 8 p.i..  
317 Median (IQR) neurobehavioral score in H37Rv i.c.vent. mice was 5.5 (5-6) compared to 4 (4-  
318 4) in CDC1551 i.c.vent. infected mice ( $p < 0.0001$ ) (Figure 3c).

319

320 Within the group of i.v.-infected mice, H37Rv *M.tb* also resulted in higher mortality  
321 than CDC1551. *M.tb* H37Rv-infected mice displayed uniform lethality by day 30 p.i., while  
322 100% survival was observed in CDC1551-infected mice (Supplementary figure 2b). The  
323 findings from the survival curve are also reflected in the neurobehavioral score over time, as

324 CDC1551 i.v. mice displayed mild to no neurological signs at week 8 p.i. (Supplementary  
325 figure 2c).

326

327 On gross pathology examination, we found that both H37Rv and CDC1551 i.v.-  
328 infected mice (Supplementary figure 2d) and H37Rv i.c.vent.-infected mice had enlarged  
329 spleen relative to saline controls (Figure 3d), indicating dissemination of infection. CDC1551  
330 i.v.-infected mice developed macroscopic granulomas in the lungs (Supplementary figure 2d)  
331 that was not observed in other groups. I.v. inoculation of *M.tb*, independent of *M.tb* strains,  
332 resulted in a disseminated infection with granuloma formation in the heart, kidneys, and  
333 spleen, which was not observed in i.c.vent.-infected mice (Supplementary figure 2e). Intra-  
334 abdominal abscesses were also found in one of the H37Rv i.v.-infected mice examined (data  
335 not shown). This was consistent with the blood culture results, where mycobacteraemia was  
336 detected in six out of 12 (50%) mice infected by the i.v. route (Supplementary figure 2f).  
337 There was no mycobacteremia in any of the i.c.vent.-infected mice (n = 11) (Figure 3e).  
338 H37Rv i.c.vent.-infected mice demonstrated a trend towards increased *M.tb* load in the brain  
339 than CDC1551 i.c.vent., with median brain CFU count of  $4.3 \times 10^6$  in H37Rv i.c.vent. and  
340  $4.9 \times 10^5$  in CDC1551 i.c.vent. mice ( $p = 0.052$ ). Interestingly, although no mycobacteremia  
341 was found in i.c.vent.-infected mice, *M.tb* was cultured from the lungs with comparable  
342 mycobacterial load in both *M.tb* strains. Median lung CFU count was  $2.9 \times 10^4$  and  $5.0 \times 10^2$   
343 in H37Rv and CDC1551 i.c.vent. mice respectively ( $p = 0.33$ ) (Figure 3e). The presence of  
344 *M.tb* in the brain was confirmed by Ziehl-Neelsen staining, with numerous intra- and extra-  
345 cellular bacilli within the brain granulomatous lesion (Figure 3f).

346



347           Collectively, these results showed that H37Rv *M.tb* is more suited than CDC1551  
348 *M.tb* for the murine CNS-TB model as H37Rv infection resulted in earlier mortality, worse  
349 neurobehavioral score and increased mycobacterial load in the brain compared to CDC1551  
350 infection. I.c.vent infection also resulted in a more localized infection relative to the  
351 widespread dissemination observed in the i.v-infected mice.

352

353 **H37Rv infection via the i.c.vent. route resulted in brain histopathological changes**  
354 **similar to human CNS-TB patients with increased expression of adhesion molecules**  
355 **relative to the i.v. route.**

356 We next conducted a thorough histological evaluation in *Nos2*<sup>-/-</sup> mice infected with  
357 H37Rv via either the i.v. or i.c.vent. route. Histopathological evaluation demonstrated that  
358 i.c.vent.-infected *Nos2*<sup>-/-</sup> mice developed more severe meningitis and parenchymal  
359 granulomas compared to i.v.-infected mice, independent of *M.tb* strains (Figure 4a-c and  
360 Supplementary figure 3). More importantly, *M.tb*-induced lesions in the brain of H37Rv  
361 i.c.vent. mice, which included pyogranuloma, granuloma, and perivascular cuffing (Figure  
362 4d), were similar to the hallmark histological lesions in human CNS-TB patients (Figure 4e).  
363 While all infected mice developed brain granulomas independent of the routes of infection  
364 and *M.tb* strain, pyogranulomas were only present in i.c.vent.-infected mice. These  
365 pyogranulomatous lesions contained a central area of liquefactive necrosis with abundant  
366 degenerated polymorphs surrounded with MNCs such as macrophages, which were  
367 sometimes epithelioid, and lymphocytes enclosed within a thin layer of fibrous capsule  
368 (Supplementary figure 4a). These necrotic brain lesions are a key feature in human CNS-TB  
369 patients [28]. In addition, the presence of neutrophils in CNS tuberculous granulomas was  
370 also demonstrated in human brain biopsies with histologically proven CNS-TB [28]. Other  
371 pathological lesions in the brain of H37Rv i.c.vent. mice included gliosis and neuronal  
372 degeneration (Supplementary figure 4b). Consistent with the more pronounced brain  
373 inflammation, H37Rv i.c.vent.-infected mice had a higher histopathological score than  
374 H37Rv i.v. mice (Table 1). In addition, the meningitis and parenchymal inflammation in the  
375 brain of H37Rv i.c.vent.-infected mice were extensive, extending far beyond the injection site  
376 with a total spread of 2500  $\mu$ m in the anterior-posterior axis (Supplementary figure 5).  
377 Collectively, these results demonstrate that i.c.vent. infection of *Nos2*<sup>-/-</sup> mice with H37Rv

378 produces a murine CNS-TB model that resembles human necrotic TB granulomas, and also  
379 recapitulates the cellular architecture of human CNS-TB tuberculomas.

380

381 To analyse the extent of granulomatous inflammation, we measured the number and  
382 size of brain granulomas in each group. H37Rv i.c.vent.-infected mice had significantly more  
383 granulomas which were larger compared to H37Rv i.v.-infected mice (Figure 4f and g).  
384 Median (IQR) granuloma size was 1.18 (0.85-2.18) mm<sup>2</sup> in H37Rv i.c.vent.-infected mice  
385 compared to 0.07 (0.03-0.10) mm<sup>2</sup> in H37Rv i.v.-infected mice ( $p = 0.0022$ ). Analysis of the  
386 adhesion molecules showed that ICAM-1 was significantly increased in i.c.vent.-infected  
387 mice relative to i.v.-infected mice (Figure 4g). P-selectin in H37Rv-infected mice was  
388 similarly upregulated in both routes of infection compared to saline controls ( $p = 0.0022$ )  
389 (Figure 4h). The higher ICAM-1 expression may explain the increased infiltration of  
390 leukocytes which in turn lead to larger granuloma size in the H37Rv i.c.vent.-infected  
391 compared to H37Rv i.v.-infected mice.

392

393 A similar trend was observed for CDC1551 *M.tb* strain. CDC1551 i.c.vent.-infected  
394 mice had a higher histopathological score than i.v.-infected mice (Supplementary Table 1),  
395 although the number of brain granulomas was similar for both routes of infection with this  
396 *M.tb* strain (Supplementary figure 6a). The median (IQR) granuloma size in i.c.vent. route of  
397 0.49 (0.43-0.74) mm<sup>2</sup> was significantly larger than the i.v. route of 0.06 (0.01-0.17) mm<sup>2</sup> ( $p =$   
398 0.0022) (Supplementary figure 6b), with corresponding increase of ICAM-1 expression in the  
399 i.c.vent-infected compared to the i.v.-infected mice (Supplementary 6c). In contrast, p-  
400 selectin expression was lower in the i.c.vent-infected mice (Supplementary 6d). These  
401 findings again indicated that while i.v.-infected mice were capable of developing CNS-TB,  
402 the i.c.vent route resulted in a more compartmentalized immunopathological response.

403

404 **H37Rv i.c.vent.-infected mice have higher expression of pro-inflammatory cytokines,**  
405 **Th1 chemokines and neutrophil chemoattractants**

406 Inflammatory cytokines found upregulated in the CSF of TBM patients included  
407 TNF- $\alpha$ , IFN- $\gamma$ , IL-1 $\beta$  and IL-6 [29, 30]. To determine if our model has a similar CNS  
408 immunological phenotype as human TBM patients, we analysed the expression of pro-  
409 inflammatory cytokines in the brain.

410

411 Pro-inflammatory cytokines TNF- $\alpha$ , IFN- $\gamma$ , IL-1 $\beta$  and IL-6 were significantly  
412 increased by 17.8-fold, 31.0-fold, 4.8-fold and 7.1-fold, respectively in H37Rv i.c.vent.  
413 compared to H37Rv i.v.-infected mice (Figure 5a-d; all  $p < 0.01$ ), and were observed in both  
414 *M.tb* strains (Supplementary Figure 7a-d). In addition, H37Rv i.c.vent.-infected mice  
415 demonstrated 31.7-fold, 7.3-fold, 6.2-fold and 56.8-fold higher expression of Th1  
416 chemokines CCL-3, -4, -5 and CXCL-10 than H37Rv i.v.-infected mice respectively (Figure  
417 5e-h; all  $p < 0.01$ ). This was also observed with the CDC1551 strain (Supplementary Figure  
418 7e-h). The higher concentration of pro-inflammatory cytokines and Th1 chemokines in  
419 i.c.vent. mice may explain the more pronounced inflammation and greater extent of  
420 inflammatory cell infiltration around cerebral blood vessels in i.c.vent.-infected compared to  
421 i.v.-infected mice.

422

423 Neutrophil chemokines CXCL-1, CXCL-2 and LIX were upregulated by 1.4-fold,  
424 35.6-fold and 5.2-fold, respectively in H37Rv i.c.vent.-infected than H37Rv i.v.-infected  
425 mice (Figure 5i-k). While CXCL-1 expression was similar between the two infection routes  
426 of CDC1551-infected mice, CDC1551 i.c.vent. mice had higher expression of CXCL-2 and

427 LIX than CDC1551 i.v. mice (Supplementary figure 7i-k). The significantly higher  
428 expression of neutrophil chemoattractants in i.c.vent.-infected mice, independent of *M.tb*  
429 strains, may explain the presence of pyogranulomas with marked neutrophilic infiltration in  
430 i.c.vent.- but not i.v.-infected mice.

431

432 Collectively, these immunological and histological findings indicate that i.c.vent.  
433 infection of *Nos2*<sup>-/-</sup> mice with H37Rv strain creates a better CNS-TB model than the i.v. route  
434 of infection as it exhibited more pronounced brain inflammation as shown by the higher  
435 expression of pro-inflammatory cytokines, Th1 chemokines and neutrophil chemoattractants.

436

## 437 **DISCUSSION**

438 Human CNS TB is severe and progress is limited by a lack of good animal model  
439 systems that reflect immunopathology in human CNS TB. Our study determined the effects  
440 of mouse strain, *M.tb* strain and route of infection on the development of a murine CNS-TB  
441 model with human-like pathology. Here, we show that i.c.vent. infection of *Nos2*<sup>-/-</sup> mice with  
442 *M.tb* H37Rv makes a CNS-TB model that shares similar clinical features of human CNS-TB,  
443 including neurological morbidity, high mortality, and increased CNS expression of  
444 inflammatory mediators. Importantly, our model demonstrated histological evidence of  
445 parenchymal granulomas in the cerebral cortex, hippocampus and the presence of necrotizing  
446 granulomas similar to human CNS-TB tuberculomas [31, 32]. The presence of a central area  
447 of liquefactive necrosis in pyogranulomas of H37Rv i.c.vent.-infected mice resembled human  
448 caseating tuberculomas with central liquefaction, a clinical feature that has not yet been  
449 replicated in existing murine CNS-TB models. Other features of human CNS-TB include  
450 perivascular infiltration with immune cells and a microglial reaction [31, 33]. Similar to that  
451 observed in humans, our CNS-TB model showed the presence of gliosis and perivascular  
452 cuffing throughout the brain parenchyma.

453

454 We evaluate the simultaneous expression of adhesion molecules, chemokines, and  
455 cytokines in an attempt to elucidate the mechanism underlying the chronic inflammatory state  
456 in human CNS-TB. While several clinical studies have unanimously demonstrated an  
457 increased CSF expression of inflammatory cytokines TNF- $\alpha$ , IFN- $\gamma$ , IL-1 $\beta$  and IL-6 in TBM  
458 patients [17, 29, 30], current murine CNS-TB models have failed to recapitulate this  
459 immunological profile [14, 16]. Through immunological analysis, we showed that H37Rv  
460 i.c.vent.-infected *Nos2*<sup>-/-</sup> mice had significantly increased expression of TNF- $\alpha$ , IFN- $\gamma$ , IL-1 $\beta$

461 and IL-6, similar to human TBM patients [29, 30], indicating that our pre-clinical model  
462 mirrors human CNS-TB. In addition, we demonstrated H37Rv i.c.vent.-infected mice  
463 exhibited upregulation of adhesion molecules p-selectin and ICAM-1 compared to saline  
464 controls, in keeping with the increased leukocyte infiltration in the brain and extends previous  
465 *in vitro* observations [34, 35], and that *M.tb* increases expression of endothelial adhesion  
466 molecules in a co-culture BBB model [36].

467

468         While i.c.vent. infection of *Nos2*<sup>-/-</sup> mice with either *M.tb* H37Rv or CDC1551 resulted  
469 in a high mortality (67% and 60% respectively), similar to human CNS-TB [37, 38], H37Rv  
470 is superior to CDC1551 as the murine CNS-TB model for two reasons. Firstly, H37Rv  
471 infection resulted in the development of more severe neurological deficits with a worse  
472 neurobehavioral score and earlier mortality than CDC1551 infection, which reflected the  
473 neurological morbidity and severity of disease in human CNS-TB [39, 40]. Secondly,  
474 H37Rv-infected mice showed an increased severity of histopathological lesions than  
475 CDC1551-infected mice, demonstrated by the greater extent of pyogranulomas and  
476 liquefactive necrosis in H37Rv i.c.vent. mice, extending from the cerebral cortex to the  
477 hippocampus which were not observed in CDC1551-infected mice, but similar to human  
478 CNS-TB histology [28]. This is consistent with previous findings where H37Rv is more  
479 virulent than CDC1551 in animal models of pulmonary TB both in rabbits [41] and in mice  
480 [42]. Although the mycobacterial load in the brain of H37Rv-infected mice had a trend to  
481 increase compared to CDC1551-infected mice, this did not reach statistical significance. A  
482 repeat experiment with a lower dose of infection, and a longer experiment with more time  
483 points may help to further characterize this CNS-TB model.

484

485 Previous murine CNS-TB models have employed direct injection into the brain  
486 parenchyma to induce CNS infection [10, 18, 21], which resulted either in granulomas being  
487 restricted to the injection site with no widespread inflammation or the absence of granulomas.  
488 Thus, to better mimic the rupture of the Rich foci in human CNS-TB, with the subsequent  
489 release of *M.tb* into the CSF to induce TBM [1], we inoculated *M.tb* into the third ventricle  
490 for meningeal infection. To prevent surgery-related loss of mice due to excessive bleeding or  
491 hemorrhage, we injected *M.tb* at an angle into the third ventricle to avoid puncturing the  
492 superior sagittal sinus. In addition to the direct CNS inoculation of *M.tb* via the i.c.vent. route,  
493 we also explored the i.v. route to mimic the natural course of hematogenous spread from the  
494 lung to the brain in human CNS-TB [43]. However, we found the i.v. route of infection to be  
495 less suited for our murine CNS-TB model, as the mice exhibited a widespread disseminated  
496 infection resembling miliary TB, with granulomas observed in multiple organs of the lungs,  
497 spleen, heart, and kidneys, but not typical brain lesions. Dissemination of *M.tb* to the heart of  
498 H37Rv i.v. mice may explain the early and uniform lethality with mortality of these mice by  
499 day 30 p.i..

500

501 Different mouse strains have different susceptibilities to *M.tb* infection, which may  
502 explain the varying degree of disease and brain histopathology in existing murine CNS-TB  
503 models. To investigate whether the C3HeB/FeJ mice, which are hypersusceptible to  
504 pulmonary TB infection [19, 20], or the *Nos2*<sup>-/-</sup> mice, which have altered innate immune  
505 response, are more susceptible to CNS-TB infection, we evaluated the C3HeB/FeJ and *Nos2*<sup>-/-</sup>  
506 mouse strains for our murine CNS-TB model. *M.tb*-infected *Nos2*<sup>-/-</sup> mice exhibited worse  
507 neurobehavioral score than C3HeB/FeJ mice and developed neurological symptoms such as  
508 myoclonic jerks and limb weakness that resembled seizures and hemiparesis respectively in  
509 human CNS-TB patients [1]. In addition, infected *Nos2*<sup>-/-</sup> mice demonstrated greater



510 inflammatory cell infiltrates, higher expression of adhesion molecules and chemokines in the  
511 brain than C3HeB/FeJ mice. Although there was trend to lower mycobacterial load in the  
512 C3HeB/FeJ mice, these infected mice expressed similar level of adhesion molecules and  
513 chemokines in the brain to saline controls, indicating that the CNS response to infection in  
514 the C3HeB/FeJ mice was minimal. These findings show that *Nos2*<sup>-/-</sup> mice is a better CNS-TB  
515 model than C3HeB/FeJ mice, and underscores the role of *Nos2*-induced NO production in  
516 inhibiting *M.tb* growth in mice [44]. The presence of abundant neutrophilic infiltrates in the  
517 brain of *Nos2*<sup>-/-</sup> mice may be due to the inability of *Nos2*<sup>-/-</sup> macrophages to contain the *M.tb*  
518 infection, as NOS2 upregulation by murine macrophages has been shown to be implicated in  
519 *M.tb* killing [22], which may result in the activation and recruitment of more leukocytes to  
520 the site of infection [28]. This may explain the greater extent of brain granulomatous  
521 inflammation seen in *Nos2*<sup>-/-</sup> mice compared to C3HeB/FeJ mice. Nevertheless, the role of  
522 NOS2 in *M.tb* killing remains controversial as human microglia do not express NOS2 [24, 25]  
523 unlike murine microglia [26]. Thus *Nos2*<sup>-/-</sup> mice may mimic the lack of NOS2 response in  
524 human and recapitulate human CNS-TB disease. Future studies investigating *M.tb* killing and  
525 cytokine and chemokine production by bone marrow-derived macrophages and neutrophils  
526 from *Nos2*<sup>-/-</sup> mice are needed to gain insight into the function and mechanism of NOS2 gene  
527 in CNS-TB pathogenesis.

528

529 Our study has limitations including the small sample size comparing C3HeB/FeJ and  
530 *Nos2*<sup>-/-</sup> mouse strains in establishing the murine CNS-TB model and the use of only male  
531 mice for the study. Nevertheless, our pilot study is useful for formal sample size calculation  
532 for future studies. Findings of the CDC1551-infected *Nos2*<sup>-/-</sup> mice by the i.c.vent route were  
533 successfully reproduced in a separate experiment evaluating the *M.tb* strain and route of  
534 infection for the CNS-TB model. Male mice were used as there is a male predominance in

535 TB [45], and literature has shown males to be more susceptible to mycobacterial infection [46,  
536 47]. Future studies characterising the responses in both genders of mice would be required for  
537 application of research findings [48].

538

## 539 **CONCLUSIONS**

540 Altogether, i.c.vent. infection of *Nos2*<sup>-/-</sup> mice with H37Rv creates a murine CNS-TB  
541 model that resembled human CNS-TB immunopathology, exhibiting the worst  
542 neurobehavioral score and with a high and early mortality reflecting disease severity and its  
543 associated neurological morbidity. In our study, extensive brain inflammation was seen with  
544 granulomas and pyogranulomas that resembled the granulomatous inflammation in human  
545 CNS-TB patients with a corresponding increase in expression of adhesion molecules, Th1  
546 cytokine response and neutrophil chemoattractants. As this model replicates the  
547 histopathological features of human CNS-TB, it is particularly useful for future drug studies  
548 to assess the penetration of potential drug candidates into CNS-TB tuberculomas, and  
549 evaluate their efficacy in reducing immunopathology and consequently improve neurological  
550 outcome in CNS-TB.

551

552 **LIST OF ABBREVIATIONS**

553 BCG: *Mycobacterium bovis* BCG

554 CFU: colony forming units

555 CNS-TB: Central nervous system tuberculosis

556 CSF: cerebrospinal fluid

557 H&E: hematoxylin-eosin

558 i.c.vent.: intra-cerebroventricular

559 IFN- $\gamma$ : Interferon- $\gamma$

560 IL: Interleukin

561 iNOS: inducible nitric oxide synthase

562 i.v.: intravenous

563 *M.tb*: *Mycobacterium tuberculosis*

564 *Nos2*: nitric oxide synthase 2

565 NO: nitric oxide

566 p.i.: post-infection

567 RNI: reactive nitrogen intermediate

568 *sst1*: super susceptibility to tuberculosis 1

569 TB: tuberculosis

570 TBM: Tuberculous meningitis

571 TNF- $\alpha$ : Tumor necrosis factor- $\alpha$

572

573 **DECLARATIONS**

574 **Ethics approval and consent to participate**

575 The Domain Specific Review Board from National Healthcare Group Singapore  
576 approved the study (Reference: 2015/00067) and human brain samples were anonymized for  
577 the purpose of this study.

578 All animal procedures were approved by the Institutional Animal Care and Use  
579 Committee of National University of Singapore under protocol R15-1068, in accordance with  
580 national guidelines for the care and use of laboratory animals for scientific purposes.

581

582 **Consent for publication**

583 Not applicable

584

585 **Availability of data and materials**

586 The data sets generated for this study are available on request to the corresponding author.

587

588 **Competing interests**

589 The authors declare that they have no competing interests.

590

591 **Funding**

592 Catherine W.M. Ong is funded by Singapore National Medical Research Council  
593 (NMRC/TA/0042/2015, CSAINV17nov014; National University Health System

594 (NUHS/RO/2017/092/SU/01, CFGFY18P11, NUHSRO/2020/042/RO5+5/ad-hoc/1),  
595 Singapore, iHealthtech at the National University of Singapore and recipient of the Young  
596 Investigator Award, Institut Merieux, Lyon, France. Xuan Ying Poh is supported by a  
597 postgraduate scholarship from the Yong Loo Lin School of Medicine, National University of  
598 Singapore. Jia Mei Hong was supported by NUSMed Post-Doctoral Fellowship  
599 (NUHSRO/2018/052/PDF/04). The behavioural experiments were carried out at the  
600 Neuroscience Phenotyping Core Facility, which is supported by the NMRC NUHS Centre  
601 Grant - Neuroscience Phenotyping Core (NMRC/CG/M009/2017\_NUH/NUHS). The work  
602 was funded by NUHSRO/2016/066/NPCseedfunding/01 and NMRC/TA/0042/2015

603

#### 604 **Authors' contributions**

605 C.W.M.O. conceived the study. P.X.Y., H.J.M., M.Q.H. and C.W.M.O. designed the  
606 experiments. C.S.L.D. provided and reviewed the human CNS-TB brain biopsy specimens.  
607 P.X.Y., H.J.M., M.Q.H., W.Y. and T.P.M. performed the experiments. P.X.Y., R.R. and  
608 C.W.M.O. analysed the data. P.X.Y. and C.W.M.O. wrote the first draft of the manuscript  
609 which was reviewed and revised by all authors.

610

#### 611 **Acknowledgements**

612 The authors would like to thank the operations team of the National University of Singapore  
613 BSL-3 core facility for the infrastructure and logistical support of the study. The authors  
614 would also like to thank National University of Singapore Comparative Medicine (CM) and  
615 the Neuroscience Phenotyping Core (NPC) for animal training and support. The authors are  
616 grateful to Professor Paul Elkington and Associate Professor Sylvie Alonso for commenting  
617 on the manuscript.

618 **REFERENCES**

- 619 1. Rock RB, Olin M, Baker CA, Molitor TW, Peterson PK: **Central nervous system**  
620 **tuberculosis: pathogenesis and clinical aspects.** *Clin Microbiol Rev* 2008, **21**:243-  
621 261, table of contents.
- 622 2. Wilkinson RJ, Rohlwink U, Misra UK, van Crevel R, Mai NTH, Dooley KE, Caws M,  
623 Figaji A, Savic R, Solomons R, et al: **Tuberculous meningitis.** *Nat Rev Neurol* 2017,  
624 **13**:581-598.
- 625 3. The Lancet N: **Tuberculosis of the CNS remains a lethal threat.** *Lancet Neurol*  
626 2011, **10**:395.
- 627 4. Rom WN, Garay SM: *Tuberculosis.* 2 edn. Philadelphia: Lippincott Williams &  
628 Wilkins; 2004.
- 629 5. Lammie GA, Hewlett RH, Schoeman JF, Donald PR: **Tuberculous cerebrovascular**  
630 **disease: a review.** *J Infect* 2009, **59**:156-166.
- 631 6. Donald PR, Schoeman JF: **Tuberculous meningitis.** *N Engl J Med* 2004, **351**:1719-  
632 1720.
- 633 7. Shope RE, Lewis PA: **A Paralytic Disease of Guinea Pigs Due to the Tubercle**  
634 **Bacillus.** *J Exp Med* 1929, **50**:365-370.
- 635 8. Bolin CA, Whipple DL, Khanna KV, Risdahl JM, Peterson PK, Molitor TW:  
636 **Infection of swine with Mycobacterium bovis as a model of human tuberculosis.**  
637 *J Infect Dis* 1997, **176**:1559-1566.
- 638 9. Tsenova L, Sokol K, Freedman VH, Kaplan G: **A combination of thalidomide plus**  
639 **antibiotics protects rabbits from mycobacterial meningitis-associated death.** *J*  
640 *Infect Dis* 1998, **177**:1563-1572.
- 641 10. Mazzolla R, Puliti M, Barluzzi R, Neglia R, Bistoni F, Barbolini G, Blasi E:  
642 **Differential microbial clearance and immunoresponse of Balb/c (Nramp1**

- 643           **susceptible) and DBA2 (Nramp1 resistant) mice intracerebrally infected with**  
644           **Mycobacterium bovis BCG (BCG).** *FEMS Immunol Med Microbiol* 2002, **32**:149-  
645           158.
- 646 11. Swaim LE, Connolly LE, Volkman HE, Humbert O, Born DE, Ramakrishnan L:  
647           **Mycobacterium marinum infection of adult zebrafish causes caseating**  
648           **granulomatous tuberculosis and is moderated by adaptive immunity.** *Infect*  
649           *Immun* 2006, **74**:6108-6117.
- 650 12. Tucker EW, Pokkali S, Zhang Z, DeMarco VP, Klunk M, Smith ES, Ordonez AA,  
651           Penet MF, Bhujwala Z, Jain SK, Kannan S: **Microglia activation in a pediatric**  
652           **rabbit model of tuberculous meningitis.** *Dis Model Mech* 2016, **9**:1497-1506.
- 653 13. Tsenova L, Mangaliso B, Muller G, Chen Y, Freedman VH, Stirling D, Kaplan G:  
654           **Use of IMiD3, a thalidomide analog, as an adjunct to therapy for experimental**  
655           **tuberculous meningitis.** *Antimicrob Agents Chemother* 2002, **46**:1887-1895.
- 656 14. van Well GT, Wieland CW, Florquin S, Roord JJ, van der Poll T, van Furth AM: **A**  
657           **new murine model to study the pathogenesis of tuberculous meningitis.** *J Infect*  
658           *Dis* 2007, **195**:694-697.
- 659 15. Schaller MA, Wicke F, Foerch C, Weidauer S: **Central Nervous System**  
660           **Tuberculosis : Etiology, Clinical Manifestations and Neuroradiological Features.**  
661           *Clin Neuroradiol* 2019, **29**:3-18.
- 662 16. Be NA, Lamichhane G, Grosset J, Tyagi S, Cheng QJ, Kim KS, Bishai WR, Jain SK:  
663           **Murine model to study the invasion and survival of Mycobacterium tuberculosis**  
664           **in the central nervous system.** *J Infect Dis* 2008, **198**:1520-1528.
- 665 17. Sharma S, Goyal MK, Sharma K, Modi M, Sharma M, Khandelwal N, Prabhakar S,  
666           Sharma N, R S, Gairolla J, et al: **Cytokines do play a role in pathogenesis of**

- 667           **tuberculous meningitis: A prospective study from a tertiary care center in India.**  
668           *J Neurol Sci* 2017, **379**:131-136.
- 669   18.   Zucchi FC, Pelegrini-da-Silva A, Neder L, Silva CL, Tsanaclis AM, Takayanagui OM:  
670           **The contribution of a murine CNS-TB model for the understanding of the host-**  
671           **pathogen interactions in the formation of granulomas.** *J Neurosci Methods* 2012,  
672           **206**:88-93.
- 673   19.   Irwin SM, Driver E, Lyon E, Schrupp C, Ryan G, Gonzalez-Juarrero M, Basaraba RJ,  
674           Nueremberger EL, Lenaerts AJ: **Presence of multiple lesion types with vastly**  
675           **different microenvironments in C3HeB/FeJ mice following aerosol infection with**  
676           **Mycobacterium tuberculosis.** *Dis Model Mech* 2015, **8**:591-602.
- 677   20.   Kramnik I, Dietrich WF, Demant P, Bloom BR: **Genetic control of resistance to**  
678           **experimental infection with virulent Mycobacterium tuberculosis.** *Proc Natl Acad*  
679           *Sci U S A* 2000, **97**:8560-8565.
- 680   21.   Olin MR, Armién AG, Cheeran MC, Rock RB, Molitor TW, Peterson PK: **Role of**  
681           **nitric oxide in defense of the central nervous system against Mycobacterium**  
682           **tuberculosis.** *J Infect Dis* 2008, **198**:886-889.
- 683   22.   Chan ED, Chan J, Schluger NW: **What is the role of nitric oxide in murine and**  
684           **human host defense against tuberculosis?Current knowledge.** *Am J Respir Cell*  
685           *Mol Biol* 2001, **25**:606-612.
- 686   23.   Schneemann M, Schoeden G: **Macrophage biology and immunology: man is not a**  
687           **mouse.** *J Leukoc Biol* 2007, **81**:579; discussion 580.
- 688   24.   Rock RB, Hu S, Deshpande A, Munir S, May BJ, Baker CA, Peterson PK, Kapur V:  
689           **Transcriptional response of human microglial cells to interferon-gamma.** *Genes*  
690           *Immun* 2005, **6**:712-719.



- 691 25. Lee SC, Dickson DW, Liu W, Brosnan CF: **Induction of nitric oxide synthase**  
692 **activity in human astrocytes by interleukin-1 beta and interferon-gamma.** *J*  
693 *Neuroimmunol* 1993, **46**:19-24.
- 694 26. Peterson PK, Hu S, Anderson WR, Chao CC: **Nitric oxide production and**  
695 **neurotoxicity mediated by activated microglia from human versus mouse brain.**  
696 *J Infect Dis* 1994, **170**:457-460.
- 697 27. Majeed S, Radotra BD, Sharma S: **Adjunctive role of MMP-9 inhibition along with**  
698 **conventional anti-tubercular drugs against experimental tuberculous meningitis.**  
699 *Int J Exp Pathol* 2016, **97**:230-237.
- 700 28. Zaharie SD, Franken DJ, van der Kuip M, van Elsland S, de Bakker BS, Hagoort J,  
701 Roest SL, van Dam CS, Timmers C, Solomons R, et al: **The immunological**  
702 **architecture of granulomatous inflammation in central nervous system**  
703 **tuberculosis.** *Tuberculosis (Edinb)* 2020, **125**:102016.
- 704 29. Nagesh Babu G, Kumar A, Kalita J, Misra UK: **Proinflammatory cytokine levels in**  
705 **the serum and cerebrospinal fluid of tuberculous meningitis patients.** *Neurosci*  
706 *Lett* 2008, **436**:48-51.
- 707 30. Misra UK, Kalita J, Srivastava R, Nair PP, Mishra MK, Basu A: **A study of**  
708 **cytokines in tuberculous meningitis: clinical and MRI correlation.** *Neurosci Lett*  
709 2010, **483**:6-10.
- 710 31. Chatterjee S: **Brain tuberculomas, tubercular meningitis, and post-tubercular**  
711 **hydrocephalus in children.** *J Pediatr Neurosci* 2011, **6**:S96-S100.
- 712 32. Donald PR, Schoeman JF: **Central nervous system tuberculosis in children.** In  
713 *Tuberculosis*. Edited by Schaaf HS, Zumla AI, Grange JM, Raviglione MC, Yew  
714 WW, Stark JR: W. B. Saunders; 2009: 413-423

- 715 33. Saez-Llorens X, Ramilo O, Mustafa MM, Mertsola J, McCracken GH, Jr.: **Molecular**  
716 **pathophysiology of bacterial meningitis: current concepts and therapeutic**  
717 **implications.** *J Pediatr* 1990, **116**:671-684.
- 718 34. Ong CW, Pabisiak PJ, Brilha S, Singh P, Roncaroli F, Elkington PT, Friedland JS:  
719 **Complex regulation of neutrophil-derived MMP-9 secretion in central nervous**  
720 **system tuberculosis.** *J Neuroinflammation* 2017, **14**:31.
- 721 35. Green JA, Dholakia S, Janczar K, Ong CW, Moores R, Fry J, Elkington PT,  
722 Roncaroli F, Friedland JS: **Mycobacterium tuberculosis-infected human**  
723 **monocytes down-regulate microglial MMP-2 secretion in CNS tuberculosis via**  
724 **TNFalpha, NFkappaB, p38 and caspase 8 dependent pathways.** *J*  
725 *Neuroinflammation* 2011, **8**:46.
- 726 36. Brilha S, Ong CWM, Weksler B, Romero N, Couraud PO, Friedland JS: **Matrix**  
727 **metalloproteinase-9 activity and a downregulated Hedgehog pathway impair**  
728 **blood-brain barrier function in an in vitro model of CNS tuberculosis.** *Sci Rep*  
729 2017, **7**:16031.
- 730 37. Porkert MT, Sotir M, Parrott-Moore P, Blumberg HM: **Tuberculous meningitis at a**  
731 **large inner-city medical center.** *Am J Med Sci* 1997, **313**:325-331.
- 732 38. Karstaedt AS, Valtchanova S, Barriere R, Crewe-Brown HH: **Tuberculous**  
733 **meningitis in South African urban adults.** *QJM* 1998, **91**:743-747.
- 734 39. Christensen AS, Andersen AB, Thomsen VO, Andersen PH, Johansen IS:  
735 **Tuberculous meningitis in Denmark: a review of 50 cases.** *BMC Infect Dis* 2011,  
736 **11**:47.
- 737 40. Shaw JET, Pasipanodya JG, Gumbo T: **Meningeal tuberculosis: high long-term**  
738 **mortality despite standard therapy.** *Medicine (Baltimore)* 2010, **89**:189-195.

- 739 41. Bishai WR, Dannenberg AM, Jr., Parrish N, Ruiz R, Chen P, Zook BC, Johnson W,  
740 Boles JW, Pitt ML: **Virulence of Mycobacterium tuberculosis CDC1551 and**  
741 **H37Rv in rabbits evaluated by Lurie's pulmonary tubercle count method.** *Infect*  
742 *Immun* 1999, **67**:4931-4934.
- 743 42. Manca C, Tsenova L, Barry CE, 3rd, Bergtold A, Freeman S, Haslett PA, Musser JM,  
744 Freedman VH, Kaplan G: **Mycobacterium tuberculosis CDC1551 induces a more**  
745 **vigorous host response in vivo and in vitro, but is not more virulent than other**  
746 **clinical isolates.** *J Immunol* 1999, **162**:6740-6746.
- 747 43. Sanchez-Garibay C, Hernandez-Campos ME, Tena-Suck ML, Salinas-Lara C:  
748 **Experimental animal models of central nervous system tuberculosis: A historical**  
749 **review.** *Tuberculosis (Edinb)* 2018, **110**:1-6.
- 750 44. Dallenga T, Linnemann L, Paudyal B, Repnik U, Griffiths G, Schaible UE: **Targeting**  
751 **neutrophils for host-directed therapy to treat tuberculosis.** *Int J Med Microbiol*  
752 2018, **308**:142-147.
- 753 45. WHO: **Global tuberculosis report 2021.** 2021.
- 754 46. Dibbern J, Eggers L, Schneider BE: **Sex differences in the C57BL/6 model of**  
755 **Mycobacterium tuberculosis infection.** *Sci Rep* 2017, **7**:10957.
- 756 47. Yamamoto Y, Tomioka H, Sato K, Saito H, Yamada Y, Setogawa T: **Sex differences**  
757 **in the susceptibility of mice to infection induced by Mycobacterium**  
758 **intracellulare.** *Am Rev Respir Dis* 1990, **142**:430-433.
- 759 48. Tannenbaum C, Ellis RP, Eyssel F, Zou J, Schiebinger L: **Sex and gender analysis**  
760 **improves science and engineering.** *Nature* 2019, **575**:137-146.
- 761
- 762

763 **FIGURES AND FIGURE LEGENDS**

764

765 **Figure 1. *Nos2*<sup>-/-</sup> strain exhibited higher neurobehavioral score and increased**  
766 **inflammatory cell infiltrate in the brain compared to C3HeB/FeJ strain post-i.c.vent.**

767 **infection with *M.tb* CDC1551.** (a) Neurobehavioral scores were significantly higher in  
768 infected *Nos2*<sup>-/-</sup> mice at 4 and 8 weeks p.i. compared with infected C3HeB/FeJ mice.

769 Parameters assessed include tremors, twitches and appearance of eyes, with higher  
770 neurobehavioral scores reflecting an increasing severity of neurological deficits. Statistical  
771 analysis conducted using two-way ANOVA with post-hoc Tukey's multiple comparisons test.

772 \*\*\*\*,  $p < 0.0001$ . (b) *M.tb* colony forming units (CFU) in the brain and lung of *Nos2*<sup>-/-</sup> is  
773 higher compared to C3HeB/FeJ mice at day 56 p.i., analyzed using Mann-Whitney test. (c)

774 Macroscopic assessment of brain, lung and spleen of *M.tb* infected *Nos2*<sup>-/-</sup> and C3HeB/FeJ  
775 mice were similar to saline controls. Images are representative of 2-4 mice per condition.

776 Scale bar = 1 cm. (d) Hematoxylin and eosin (H&E) stain of a representative brain section  
777 from each group is shown, demonstrating normal brain histology in saline control mice and  
778 histopathology in infected mice. High-power views (insets) demonstrate more inflammatory

779 cell infiltrate in the brain of infected *Nos2*<sup>-/-</sup> compared to C3HeB/FeJ mice. Scale bar = 200  
780  $\mu\text{m}$ . (e and f) Infected *Nos2*<sup>-/-</sup> have increased concentrations of (e) ICAM-1 and (f) p-selectin

781 in the brain compared to C3HeB/FeJ mice. Adhesion molecule concentrations were  
782 normalised to total protein concentration and compared using two-way ANOVA with Sidak's

783 multiple comparisons test. Bars represent median and IQR. \*,  $p < 0.05$ ; \*\*,  $p < 0.01$ ; \*\*\*,  $p <$   
784  $0.001$ . Inf = infected; Sal = saline. *Nos2*<sup>-/-</sup> saline: n = 2; *Nos2*<sup>-/-</sup> infected: n = 3; C3HeB/FeJ

785 saline: n = 4; C3HeB/FeJ infected: n = 4.

786

787 **Figure 2. CDC1551 i.c.vent.-infected *Nos2*<sup>-/-</sup> mice demonstrated increased concentration**  
788 **of Th1-associated cytokines and chemokines, and neutrophil chemoattractants**  
789 **compared to C3HeB/FeJ infected mice at 8 weeks p.i..** Concentrations of chemokines and  
790 cytokines in brain homogenates were normalised against total protein concentration.  
791 Statistical analysis performed using two way ANOVA with Sidak's multiple comparisons test.  
792 Bars represent median and IQR. \*, p < 0.05; \*\*, p < 0.01; \*\*\*, p < 0.001. *Nos2*<sup>-/-</sup> saline: n = 2;  
793 *Nos2*<sup>-/-</sup> infected: n = 3; C3HeB/FeJ saline: n = 4; C3HeB/FeJ infected: n = 4.  
794

795 **Figure 3. I.c.vent. infection of *Nos2*<sup>-/-</sup> mice with H37Rv resulted in earlier mortality,**  
796 **higher neurobehavioral score, and increased mycobacterial load in the brain compared**  
797 **to CDC1551.** (a) *M.tb*-infected mice lost significantly more weight than saline control,  
798 analysed using two-way ANOVA with post-hoc Tukey's multiple comparisons test.  
799 Percentage change in body weight relative to initial body weight at day 0 p.i. is shown. Bars  
800 represent mean ± SEM. \*\*, p < 0.01; \*\*\*, p < 0.001. Statistical analysis between H37Rv-  
801 infected mice and saline controls in red asterisks, while comparisons between CDC1551-  
802 infected mice and saline controls in blue asterisks. (b) Kaplan-Meier curve shows a  
803 significant difference in survival between the groups. (c) H37Rv i.c.vent. demonstrate higher  
804 neurobehavioral score at 8 weeks p.i. compared to CDC1551 i.c.vent. mice, analyzed using  
805 two-way ANOVA with post-hoc Tukey's multiple comparisons test. \*\*, p < 0.01; \*\*\*\*, p <  
806 0.0001. (d) Gross pathological examination of brain, lung and spleen show no difference  
807 between saline control and *M.tb*-infected mice except for enlarged spleen in H37Rv i.c.vent-  
808 infected mice. Scale bar = 1 cm. (e) H37Rv-infected mice show a trend towards increased  
809 *M.tb* load in the brain, while lung and blood CFU were comparable to CDC1551-infected  
810 mice. Bars represent median and IQR. Statistical analysis was conducted using Mann-  
811 Whitney test. (f) Low-power view of a representative H&E-stained granuloma in the brain of

812 H37Rv i.c.vent. mice. High-power view (inset) demonstrates numerous intra- and  
813 extracellular acid-fast bacilli (black arrows) by Ziehl-Neelson (ZN) stain within the brain  
814 granuloma. Scale bars represent 1 mm in H&E stain and 20  $\mu$ m in ZN stain. Saline: n = 6;  
815 H37Rv: n = 6; CDC1551: n = 5.  
816

817 **Figure 4. *Nos2*<sup>-/-</sup> mice infected with H37Rv by the i.c.vent. route developed**  
818 **pyogranulomas and larger granulomatous lesions with increased concentrations of**  
819 **ICAM-1 compared to i.v. route.** (a) Overall histopathology via H&E stain demonstrate  
820 more severe (b) meningitis and (c) parenchymal granulomatous inflammation in H37Rv  
821 i.c.vent. than H37Rv i.v. mice. Bottom panel: high-power views of insets. (d – e) H&E stain  
822 demonstrate extensive tissue necrosis (top), granuloma (middle), and perivascular cuffing  
823 (bottom) in (d) H37Rv i.c.vent. mice and (e) human CNS-TB biopsy specimen. (f – g)  
824 H37Rv i.c.vent.-infected mice had more and larger brain granulomas. The number and size of  
825 granulomas in each group were respectively quantified from 6 different sections of 6 mice,  
826 analyzed using Mann-Whitney test. H37Rv i.c.vent.-infected mice showed higher levels of (h)  
827 ICAM-1 compared to i.v.-infected mice, whereas (i) p-selectin levels were comparable. Bars  
828 represent median and IQR. Statistical analysis was conducted using Mann-Whitney test. \*\*, p  
829 < 0.01. n = 6 mice were used per experimental group. Scale bar = 1 mm (a), 200  $\mu$ m (b – e).

830

831 **Figure 5. H37Rv infection of *Nos2*<sup>-/-</sup> mice by the i.c.vent. route resulted in significantly**  
832 **higher brain expression of inflammatory mediators than the i.v. route.** H37Rv i.c.vent.-  
833 infected mice had higher concentrations of (a-d) pro-inflammatory cytokines, (e-h) Th1  
834 chemokines, and (i-k) neutrophil chemoattractants than H37Rv i.v. mice. Concentrations of  
835 inflammatory mediators in the brain were measured after day 21 p.i.. Concentration of each

836 immunological marker was normalised against the total protein concentration. Bars represent  
837 median and interquartile ranges. Statistical analysis was conducted using Mann-Whitney test.  
838 \*,  $p < 0.05$ ; \*\*,  $p < 0.01$ .  $n = 6$  mice were used per experimental group.

839 **TABLES**

840 **Table 1. Histopathological evaluation of *M.tb*-induced lesions in H37Rv-infected *Nos2*<sup>-/-</sup>**

841 **mice**

| Lesions <sup>A</sup>                     | H37Rv i.v. |   |   |   | H37Rv i.c.vent. |   |   |   |
|------------------------------------------|------------|---|---|---|-----------------|---|---|---|
|                                          | M          | C | H | T | M               | C | H | T |
| Inflammation (MNCs)                      | 0          | 0 | 0 | 0 | 1               | 3 | 2 | 0 |
| Perivascular cuffing                     |            | 0 | 0 | 0 |                 | 3 | 2 | 2 |
| Gliosis                                  |            | 1 | 1 | 0 |                 | 3 | 1 | 0 |
| Granuloma                                |            | 1 | 2 | 0 |                 | 2 | 0 | 0 |
| Pyrogranuloma                            |            | 0 | 0 | 0 |                 | 4 | 3 | 0 |
| Neuronal degeneration/necrosis           |            | 0 | 0 | 0 |                 | 2 | 1 | 0 |
| Liquefactive necrosis (+/-) <sup>B</sup> |            | + | + | - |                 | + | + | - |
| Presence of bacilli (+/-) <sup>B</sup>   | -          | - | + | - | -               | + | + | - |

842 M: meninges; C: cerebral cortex; H: hippocampus; T: thalamus

843 <sup>A</sup> Severity of lesions in each group are scored on a scale of 0–5: 0 – no abnormalities detected;

844 1 – minimal; 2 – mild; 3: moderate; 4: marked; 5: severe. The average score of 5–6 mice per

845 group is shown.

846 <sup>B</sup> +/-: present/absent

847



848 **Table 2. Composite neurobehavioral score criteria for CNS-TB mouse model**

| <b>Criteria</b>              | <b>Score</b> |
|------------------------------|--------------|
| <b>Tremors</b>               |              |
| Absent                       | 1            |
| Present                      | 2            |
| <b>Twitch/jerk</b>           |              |
| Absent                       | 1            |
| Mild (< 3 in 10 sec)         | 2            |
| Severe ( $\geq$ 3 in 10 sec) | 3            |
| <b>Eyes</b>                  |              |
| Normal                       | 1            |
| Closed eyelids               | 2            |

849

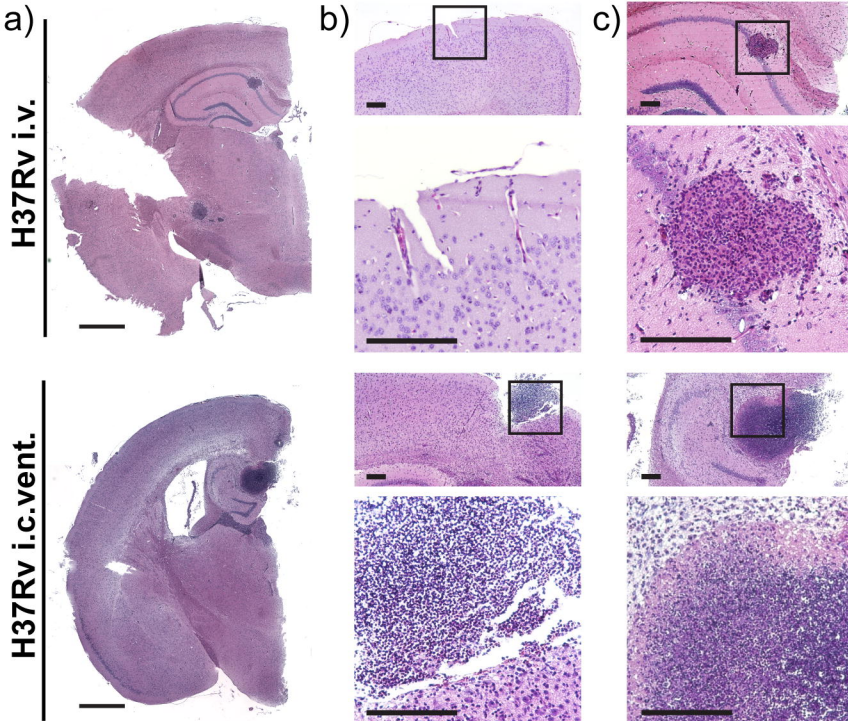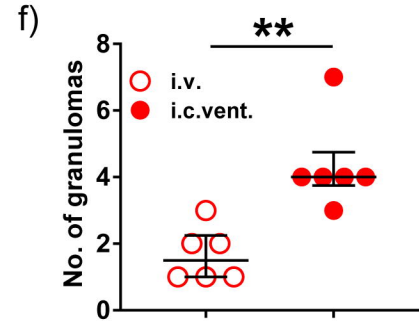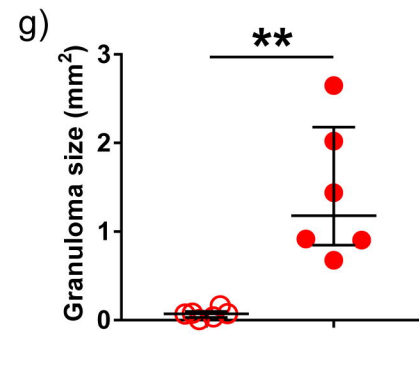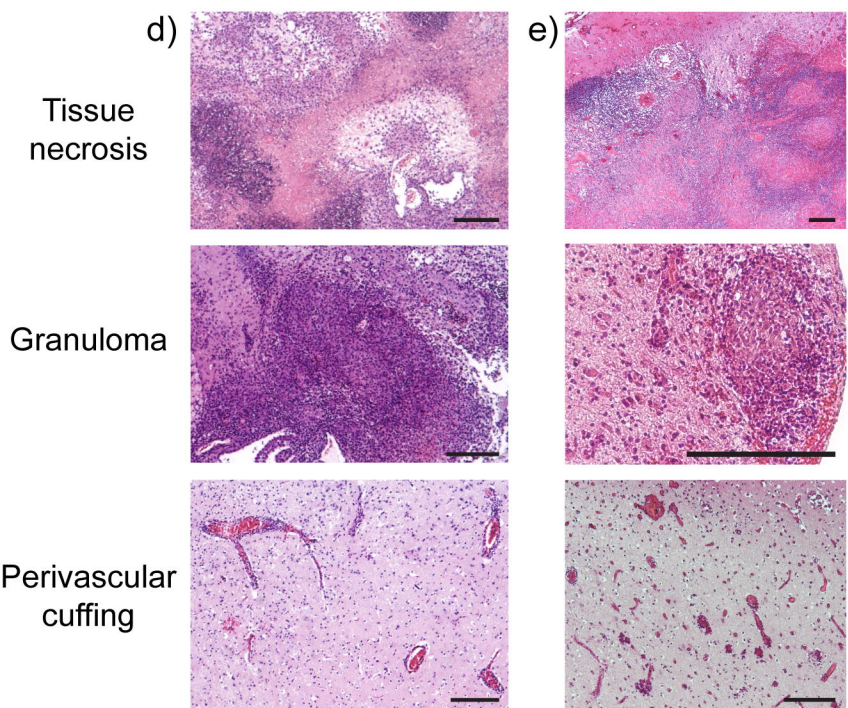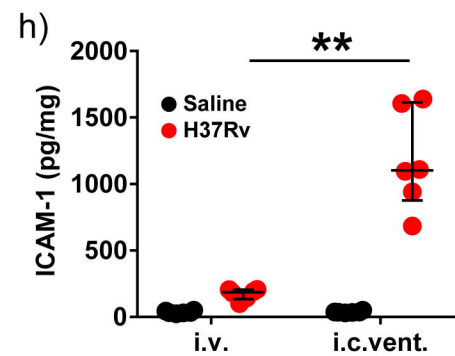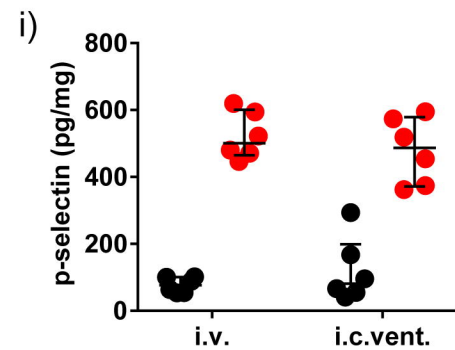



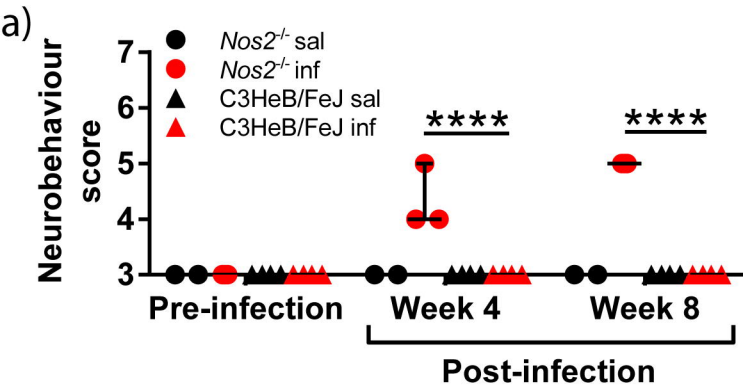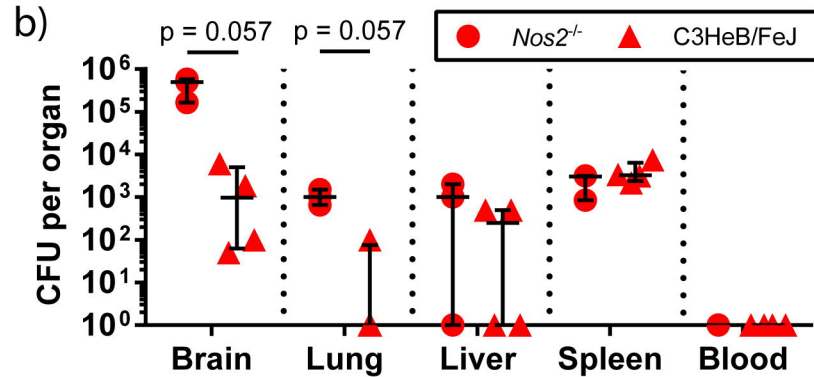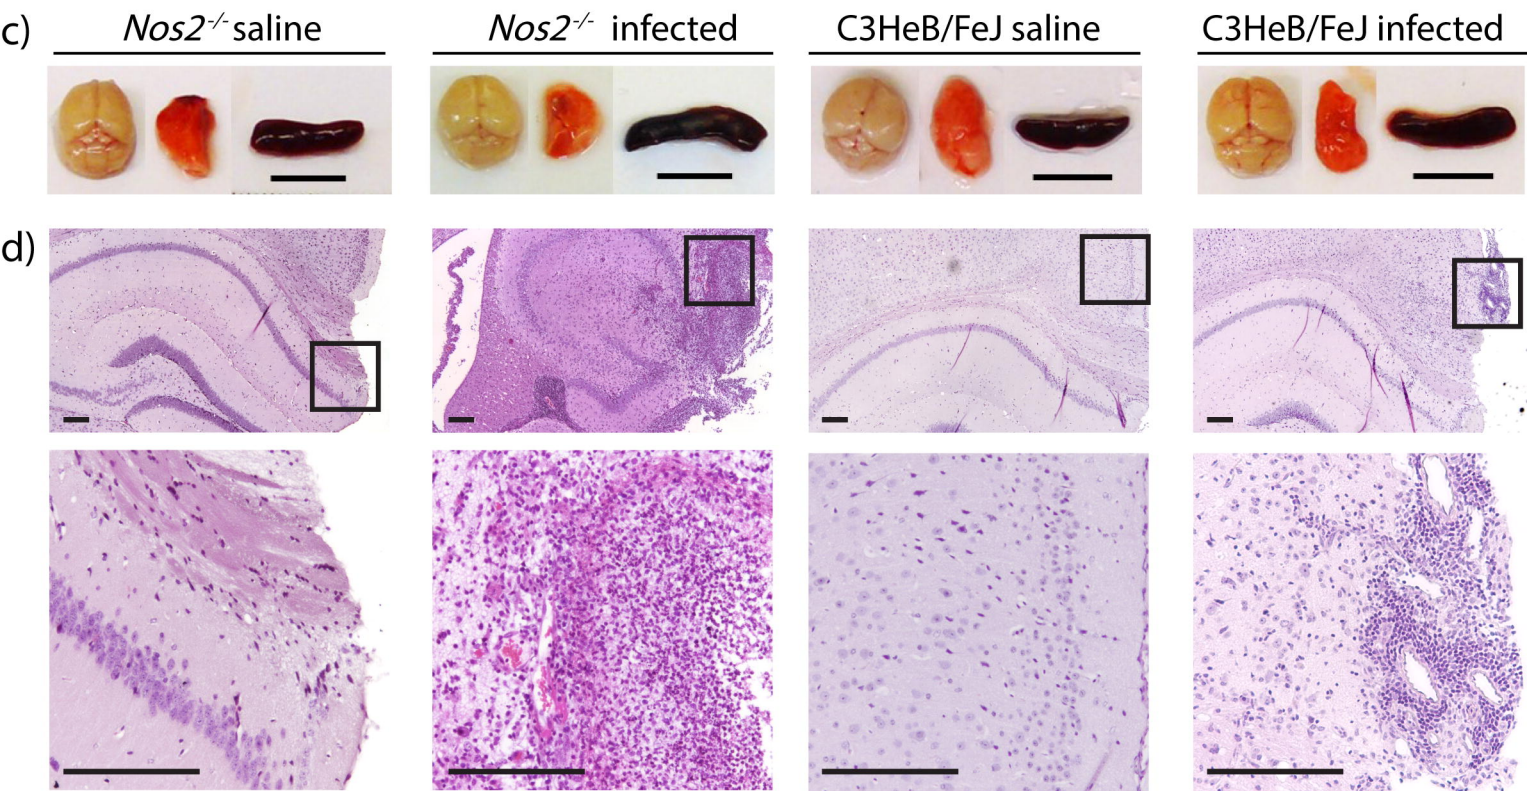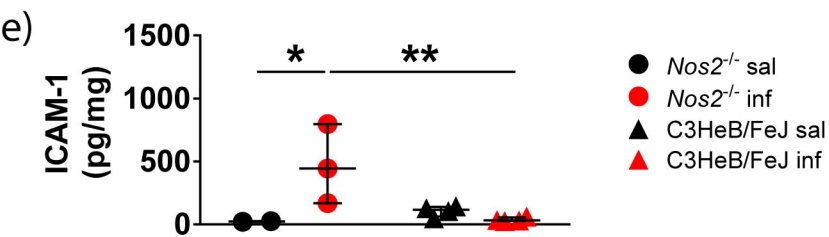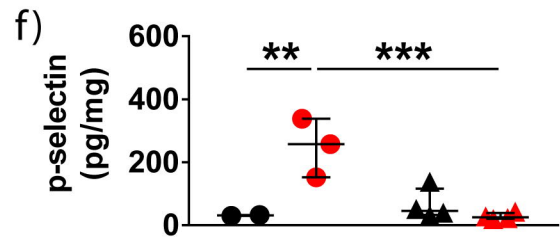



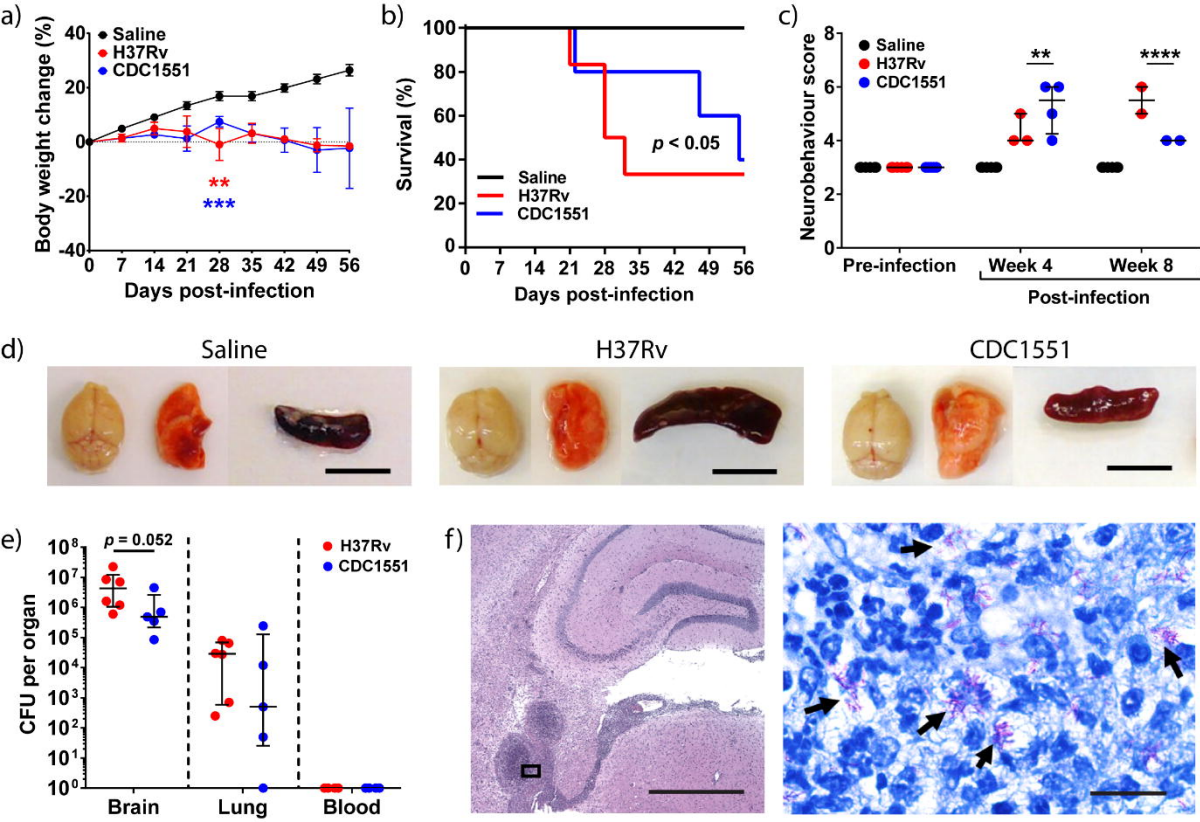

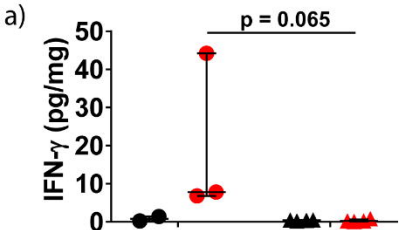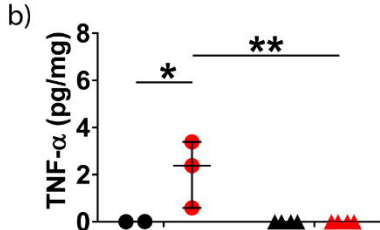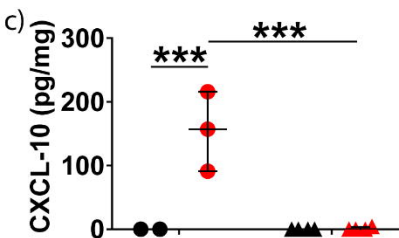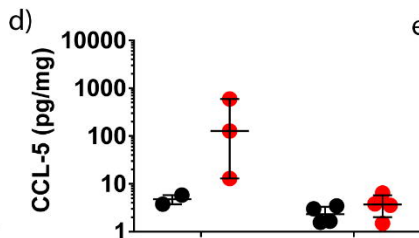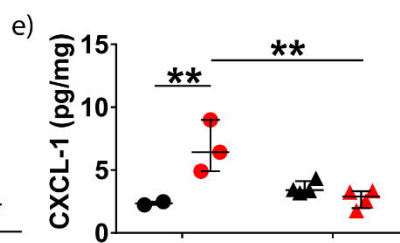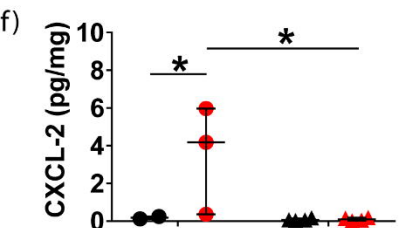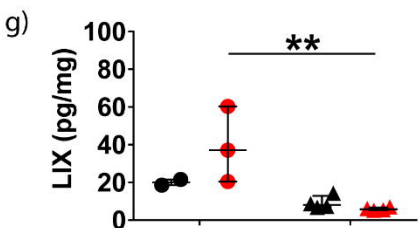

Source: https://www.biorxiv.org/content/10.1101/2021.08.15.456427v2.full.pdf
